# Supplementary material for: Short-term weight gain among preschool children in rural Burkina Faso: a secondary analysis of a randomised controlled trial
Source: PubMed Central journal article supplement — BMJ Open. 2019 Jul 29;9(7):e029634. doi: 10.1136/bmjopen-2019-029634 (PMC6677972; doi:10.1136/bmjopen-2019-029634), 2019-07-29
Supplement: bmjopen-2019-029634.draft_revisions.pdf [file bmjopen-2019-029634.draft_revisions.pdf]

# BMJ Open

BMJ Open is committed to open peer review. As part of this commitment we make the peer review history of every article we publish publicly available.

When an article is published we post the peer reviewers' comments and the authors' responses online. We also post the versions of the paper that were used during peer review. These are the versions that the peer review comments apply to.

The versions of the paper that follow are the versions that were submitted during the peer review process. They are not the versions of record or the final published versions. They should not be cited or distributed as the published version of this manuscript.

BMJ Open is an open access journal and the full, final, typeset and author-corrected version of record of the manuscript is available on our site with no access controls, subscription charges or pay-per-view fees (<http://bmjopen.bmj.com>).

If you have any questions on BMJ Open's open peer review process please email [info.bmjopen@bmj.com](mailto:info.bmjopen@bmj.com)

# BMJ Open

## Short-term weight gain among preschool children in rural Burkina Faso: a prospective study

|                               |                                                                                                                                                                                                                                                                                                                                                                                                                                                                                                                                                                                                                                                                                                                                                                                                                                |
|-------------------------------|--------------------------------------------------------------------------------------------------------------------------------------------------------------------------------------------------------------------------------------------------------------------------------------------------------------------------------------------------------------------------------------------------------------------------------------------------------------------------------------------------------------------------------------------------------------------------------------------------------------------------------------------------------------------------------------------------------------------------------------------------------------------------------------------------------------------------------|
| Journal:                      | <i>BMJ Open</i>                                                                                                                                                                                                                                                                                                                                                                                                                                                                                                                                                                                                                                                                                                                                                                                                                |
| Manuscript ID                 | bmjopen-2019-029634                                                                                                                                                                                                                                                                                                                                                                                                                                                                                                                                                                                                                                                                                                                                                                                                            |
| Article Type:                 | Research                                                                                                                                                                                                                                                                                                                                                                                                                                                                                                                                                                                                                                                                                                                                                                                                                       |
| Date Submitted by the Author: | 02-Feb-2019                                                                                                                                                                                                                                                                                                                                                                                                                                                                                                                                                                                                                                                                                                                                                                                                                    |
| Complete List of Authors:     | Dennis, Elena; University of California San Francisco, Francis I Proctor Foundation<br>Sie, Ali; Centre de Recherche en Sante de Nouna<br>Ouermi, Lucienne; Centre de Recherche en Sante de Nouna<br>Dah, Clarisse; Centre de Recherche en Sante de Nouna<br>Tapsoba, Charlemagne; Centre de Recherche en Sante de Nouna<br>Zabre, Pascal; Centre de Recherche en Sante de Nouna<br>Bärnighausen, Till ; Heidelberg University, Institute of Public Health<br>O'Brien, Kieran; University of California, San Francisco, Francis I. Proctor Foundation<br>Lebas, Elodie; University of California San Francisco, Francis I Proctor Foundation<br>Keenan, Jeremy; University of California, San Francisco, F.I. Proctor Foundation<br>Oldenburg, Catherine; University of California San Francisco, Francis I Proctor Foundation |
| Keywords:                     | nutritional status, food insecurity, Burkina Faso, Nutrition < TROPICAL MEDICINE                                                                                                                                                                                                                                                                                                                                                                                                                                                                                                                                                                                                                                                                                                                                               |
|                               |                                                                                                                                                                                                                                                                                                                                                                                                                                                                                                                                                                                                                                                                                                                                                                                                                                |

SCHOLARONE™  
Manuscripts

1  
2  
3  
4 **Short-term weight gain among preschool children in rural Burkina Faso: a prospective**  
5 **study**  
6

7  
8 Elena G. Dennis<sup>1</sup>, Ali Sié<sup>2</sup>, Lucienne Ouermi<sup>2</sup>, Clarisse Dah<sup>2</sup>, Charlemagne Tapsoba<sup>2</sup>, Pascal  
9 Zabre<sup>2</sup>, Till Bärnighausen<sup>3,4,5</sup>, Kieran S. O'Brien<sup>1</sup>, Elodie Lebas<sup>1</sup>, Jeremy D. Keenan<sup>1,6</sup>,  
10 Catherine E. Oldenburg<sup>1,6,7</sup>  
11

12 <sup>1</sup>Francis I. Proctor Foundation, University of California, San Francisco, USA

13 <sup>2</sup>Centre de Recherche en Sante de Nouna, Nouna, Burkian Faso

14 <sup>3</sup>Heidelberg Institute for Global Health, Heidelberg, Germany

15 <sup>4</sup>Department of Global Health and Population, Harvard T.H. Chan School of Public Health,  
16 Boston, MA, USA

17 <sup>5</sup>Africa Health Research Institute, Somkhele, South Africa

18 <sup>6</sup>Department of Ophthalmology, University of California, San Francisco, USA

19 <sup>7</sup>Department of Epidemiology and Biostatistics, University of California, San Francisco, USA  
20  
21

22  
23 **Author for Correspondence:**

24 Catherine E. Oldenburg, ScD MPH  
25 513 Parnassus Ave, Room S347  
26 San Francisco, CA 94143  
27 Phone: 415-502-8843  
28 Email: catherine.oldenburg@ucsf.edu  
29

30  
31 **Word Count:** 2719

32 **Abstract Word Count:** 228

33 **Tables:** 3

34 **References:** 20  
35  
36  
37  
38  
39  
40  
41  
42  
43  
44  
45  
46  
47  
48  
49  
50  
51  
52  
53  
54  
55  
56  
57  
58  
59  
60

## ABSTRACT

**Objectives.** Nutrition has profound effects on children's health outcomes and is linked to weight gain and cognitive development. We used data from a randomized controlled trial to evaluate the prospective associations between dietary, socioeconomic, and demographic factors and short-term weight gain during the lean season in a rural area of Burkina Faso.

**Design.** Prospective cohort data arising from a randomized controlled trial of the effect of antibiotic distribution on child growth and intestinal microbial diversity.

**Setting.** Two rural communities in Nouna District, Burkina Faso.

**Participants.** 248 children aged 6-59 months living in the study communities were enrolled in the study.

**Primary and secondary outcome measures.** Anthropometric measurements, including weight and height, were obtained at baseline and one month.

**Results.** Of 248 children enrolled in the trial, the median weight for wasted children at baseline (WHZ < -2) was 9.78 kg (IQR 8.65 to 10.8) and the weight of non-wasted children was 12.85 kg (IQR 10.9 to 14.75). Food security was significantly associated with decreased weight gain velocity (aOR -14.1 g/kg/day, 95% CI -27.5 to -0.65,  $P=0.04$ ).

**Conclusion.** In this study, experiences of household food insecurity were associated with decreased weight gain in children in rural Burkina Faso during the lean season. Understanding the relationship between food insecurity and anthropometric outcomes may help to develop policies and health programs that address both of these issues.

**Trial Registration.** ClinicalTrials.gov NCT03187834

**Key Words.** nutritional status; food insecurity; Burkina Faso

### Strengths and limitations of this study

- We used prospective data collected during the lean season in rural Burkina Faso to evaluate factors associated with weight gain in preschool children.
- Data were collected during the lean season in Burkina Faso, when children are at particularly high risk of malnutrition.
- Data were collected in a standardized fashion by trained anthropometrists.
- Limitations include the relatively small sample size and low prevalence of wasting, which may limit power particularly for analyses of factors associated with wasting.

## BACKGROUND

Undernutrition is implicated in 50% of child deaths every year [1]. Nutrition has profound effects on health throughout the human life course and is inextricably linked to weight gain and cognitive development during early childhood [2]. In rural settings with insufficient resources, children are at greater risk of failing to reach their full growth and development potential [2]. Several cross-sectional studies have evaluated the underlying factors that contribute to malnutrition in an attempt to improve strategies to address the prevalence of child undernutrition, focusing primarily on nutrition-related determinants of growth. These studies identified several potential modifiable risk factors for undernutrition.

Dietary diversity is critical to ensure sufficient micronutrient intake [3]. Numerous studies have linked dietary diversity to nutritional status in children [4], finding that greater diversity is associated with a greater likelihood of meeting nutrient requirements and positive health outcomes [3]. In a study using data from 11 Health and Demographic surveys, dietary diversity was significantly associated with increased height-for-age Z-score (HAZ) in 7 countries [3], indicating that dietary diversity is important for a child's long-term nutritional status.

Food insecurity is associated with lower dietary diversity and poorer child health outcomes [5]. Food insecurity has a wide range of causes, including low socioeconomic status and seasonal variation in food availability [6]. In sub-Saharan Africa and particularly in rural, agrarian areas, the dependence on rainfall and the abundance of subsistence farming create seasonal variations in food availability [7]. In the Sahel region, many experience a "lean season" during seasonal rains, typically April to August. Conversely, these populations also experience a drier post-harvest season from January through March [7]. Seasonal variation in rainfall contributes to an increase in morbidity such as malaria, diarrhea, and upper and lower respiratory

1  
2  
3 infections. These diseases can impact a child's nutritional status by increasing their nutritional  
4 needs and decreasing their appetite [7]. A study conducted in Burkina Faso found that the  
5 diversity of household diets was greater throughout all seasons with higher food expenditures,  
6 greater crop production and sale and with a household head educated at the post-secondary level  
7 [8].  
8  
9

10  
11 Although multiple cross-sectional studies have evaluated the association between dietary  
12 diversity and sociodemographic factors and nutritional status, fewer studies have examined  
13 factors influencing weight gain in young children prospectively. Understanding underlying  
14 systemic contributors to child undernutrition may help the development of future interventions to  
15 increase weight gain during seasons with high food insecurity. Here, we used data from a  
16 randomized controlled trial to evaluate the prospective associations between dietary,  
17 socioeconomic, and demographic factors to evaluate short-term weight gain during the beginning  
18 of the lean season in a rural area of Burkina Faso.  
19  
20  
21  
22  
23  
24  
25  
26  
27  
28  
29  
30  
31  
32  
33  
34

## 35 **METHODS**

### 36 **Study Setting**

37  
38 This study was conducted in the Nouna Health and Demographic Surveillance Site  
39 (HDSS) in the sub-Saharan villages of Kamadena and Dara in rural northwestern Burkina Faso.  
40 The HDSS represents roughly one-quarter of the Nouna Health District in terms of surface and  
41 population, and the population is primarily made up of cattle keepers and subsistence farmers [9].  
42 This study was conducted from July through August 2017, during the beginning of the rainy  
43 season in Burkina Faso, which lasts from July through October. The rainy season coincides with  
44 peak malaria and malnutrition in the Sahel and sub-Saharan. This study was reviewed and approved  
45  
46  
47  
48  
49  
50  
51  
52  
53  
54  
55  
56  
57  
58  
59  
60

1  
2  
3 by the Committee on Human Research at the University of California, San Francisco and the  
4  
5 Comité Institutionnel d’Ethique at the Centre de Recherche en Santé de Nouna (CRSN). The  
6  
7 caregiver of each child enrolled in the study provided written informed consent.  
8  
9  
10

## 11 12 **Participants & Procedures**

13  
14 Data for the present analysis arose from a randomized controlled trial designed to assess  
15  
16 the effect of commonly-used childhood antibiotics on the composition of the intestinal  
17  
18 microbiome and anthropometry [10, 11]. Children ages 6-59 months in households with two to  
19  
20 three children at the most recent HDSS census were eligible for participation. Households were  
21  
22 excluded if one of the children was unable to participate in the baseline assessment, due to illness  
23  
24 or absence. If the household had two or three children, they were all enrolled and anthropometric  
25  
26 measures were taken. Children’s caregivers completed assessments at the beginning of the study.  
27  
28  
29 All data was collected and managed in CommCare (Dimagi, Cambridge, MA, USA).  
30  
31  
32  
33  
34

## 35 **Anthropometric Assessment**

36  
37 Height, weight, and mid-upper-arm circumference (MUAC) measurements were assessed  
38  
39 at baseline and at 35 days after enrollment. Children were weighed standing if able or in the arms  
40  
41 of a caregiver, with heavy garments and jewelry removed. Recumbent length was measured in  
42  
43 children < 24 months of age and standing height in children > 24 months of age (Seca 874 flat  
44  
45 floor scale, Seca GMBH & Co.). Height and weight measurements were taken three times and  
46  
47 the median for each measure was used for analysis. Weight-for-height (WHZ) and weight-for-  
48  
49 age (WAZ) Z-scores were calculated based on 2006 World Health Organization Child Growth  
50  
51 Standards [12]. Change in weight, defined as the mean difference, and weight gain velocity,  
52  
53  
54  
55  
56  
57  
58  
59  
60



1  
2  
3 defined as grams per kilogram per day (g/kg/day) were also calculated. Wasting was defined as  
4  
5 WHZ and WAZ < -2 SD, respectively.  
6  
7  
8  
9

## 10 **Predictors**

11  
12 Age and sex were extracted from the HDSS database. Dietary diversity, food insecurity  
13  
14 status, breastfeeding status, health care facility visits, and animal and latrine ownership were  
15  
16 assessed at baseline by asking caregivers in their local dialect a variety of questions for each  
17  
18 topic. Dietary diversity was evaluated using a questionnaire that asked if the child had eaten a  
19  
20 series of 11 food groups in the past 7 days, including grains (millet, rice, sorghum), vitamin-A  
21  
22 abundant foods (carrots, sweet potatoes, squash), greens, mangoes/papayas, other fruits,  
23  
24 vegetables, proteins (meat, poultry, or fish), eggs, legumes, dairy products (milk, yogurt, cheese,  
25  
26 etc.), fats (coconut milk, butter, oil etc.), sugary beverages, fortified foods, and ready to eat  
27  
28 supplementary or therapeutic foods [4, 13]. The answers were made into a composite dietary  
29  
30 diversity score by summing the number of food groups reported for each child by the caregiver.  
31  
32 The possible range was 0, for children who ate none of the food groups, to 11, for children who  
33  
34 ate foods from every food group. For each household, caregivers reported on three questions  
35  
36 regarding food insecurity, including the number of times in the past four weeks the caregiver  
37  
38 worried about not having enough food in the household, if a member had gone to bed hungry in  
39  
40 the past four weeks and if a member had to eat limited amount of food because lack of resource  
41  
42 in the previous four weeks [4, 14]. Breastfeeding status was measured by asking caregivers if  
43  
44 the child was breastfed and if so, if the child was exclusively breastfed. Caregivers reported on  
45  
46 the number of poultry, goats/sheep, and cows that their household owned. The total number of  
47  
48 animals was summed. Finally, each caregiver reported whether they had visited a health facility  
49  
50  
51  
52  
53  
54  
55  
56  
57  
58  
59  
60

1  
2  
3 for their child in the past 30 days and on the sanitation installation most commonly used by their  
4 household, categorized as none (open defecation), latrine with slab, or latrine without slab.  
5

6  
7 Finally, the child's randomization arm was included as a covariate in all models.  
8  
9

## 10 11 12 **Sample Size**

13  
14 The sample size calculation was based on the primary outcome of the trial, Simpson's  $\alpha$   
15 diversity. A sample size of 30 children per arm was estimated to provide at least 80% power to  
16 detect a 1.5-unit difference in Simpson's  $\alpha$  diversity based on a previous study in Niger.[15]  
17  
18  
19  
20  
21  
22  
23

## 24 **Statistical Methods**

25  
26 All statistical analyses were performed in Stata 15.1 (StataCorp, College Station, TX,  
27 USA). Descriptive statistics were calculated with medians and interquartile ranges for continuous  
28 variables and proportions for categorical variables. To assess predictors of weight gain in the  
29 one-month period, a bivariate model was built for each anthropometric outcome (WHZ, change  
30 in weight in grams, wasting status at day 35, and g/kg/day) and each baseline predictor  
31 (including age, sex, dietary diversity score, food insecurity score, latrine ownership, animal  
32 ownership, healthcare facility use, and breastfeeding status). One model was built per outcome.  
33  
34 Linear regression analyses were performed for the continuous outcomes and a logistic regression  
35 analysis was run for the dichotomous outcome. Multivariable models were then built for each  
36 anthropometric outcome with all candidate predictor variables, including child's sex, age,  
37 baseline WHZ, food insecurity, healthcare facility usage, dietary diversity score, breastfeeding  
38 status, animal ownership, and latrine ownership. Standard errors of all regression models were  
39 adjusted for clustering at the household level.  
40  
41  
42  
43  
44  
45  
46  
47  
48  
49  
50  
51  
52  
53  
54  
55  
56  
57  
58  
59  
60

## RESULTS

For the trial, 165 households were assessed for eligibility and 41 were excluded because two children were not present in the household. The remaining 124 households were eligible for inclusion and were enrolled in the study [11]. A total of 248 children were enrolled in the study and included in the analysis. Table 1 lists baseline descriptive statistics from the analysis. From the total number of children, 49.9% were female and the median age was 37 months (IQR 23 to 49). The median baseline weight for children with WHZ < -2 was 9.78 kg (IQR 8.65 to 10.8). This weight differed substantially from the baseline weight of non-wasted children, which was 12.85 kg (IQR 10.9 to 14.75). Wasted children had a median WHZ of -2.29 (IQR -2.43 to -2.2), compared to non-wasted children with a median WHZ of -0.18 (IQR -0.91 to 0.4). Approximately 50% of caregivers with wasted children reported that they visited a health care facility in the past 30 days. The median dietary diversity score was 6 for both groups, non-wasted (IQR 4 to 7) and wasted (IQR 5 to 7). Households with a wasted child owned a median of 24.5 animals (IQR 6 to 54) while the families of non-wasted children owned a median of 13 (6 to 28). More wasted children were breastfed (35.7%) compared to non-wasted children (21.1%).

From baseline to one month, 232 non-wasted children gained a median of 320 grams (IQR 50 to 600), and weight gain velocity was 0.71 g/kg/day (IQR 0.12 to 1.37). The median WHZ at one month after baseline was -0.21 SD (IQR -1.04 to 0.36), and 5.7% of children were wasted.

Table 2 lists a series of bivariate and multivariable models depicting the association between candidate predictor variables and WHZ and wasting status one month after baseline. The only significant predictor of WHZ at one month was baseline WHZ. For wasting status at

1  
2  
3 one-month, dietary diversity was associated with increased odds of wasting (aOR 3.3 per one-  
4 unit increase in dietary diversity, 95% CI 1.5 to 7.4,  $P=0.004$ ). Children who had visited the  
5 health facility in the past month had increased odds of wasting (aOR 70.2, 95% CI 3.3 to 1499.0,  
6  $P=0.01$ ), and children living in households owning greater numbers of animals had reduced odds  
7 of wasting (aOR 0.93 per one additional animal owned by the household, 95% CI -0.87 to 0.10,  
8  $P=0.04$ ). However, wasting at one month was relatively uncommon (5.7%) and confidence  
9 intervals were wide. There was a non-significant decrease in animal ownership (-0.92 SD per  
10 one-unit increase in food insecurity score [CI 95% -2.22 to 0.37],  $p=0.16$ ). The association  
11 between breastfeeding and the child's WHZ score was also strong with each increase in  
12 breastfeeding associated with a decrease of the child's WHZ score by a factor of -0.48 grams  
13 (95% CI -0.79 to -0.18;  $p=0.002$ ). Food insecurity was not significantly associated with WHZ or  
14 wasting one month after the baseline visit.  
15  
16  
17  
18  
19  
20  
21  
22  
23  
24  
25  
26  
27  
28  
29  
30

31 Table 3 lists bivariate and multivariable models for the association between candidate  
32 predictor variables and weight change and weight gain velocity during the one month period. In  
33 the multivariable model, children in households with higher food insecurity scores had decreased  
34 weight gain velocity (mean difference -0.04 g/kg/day per one-unit increase in food insecurity,  
35 95% CI -0.07 to -0.01,  $P=0.01$ ). Dietary diversity was not significantly associated with weight  
36 gain velocity (mean difference -0.06 g/kg/day for every one-unit increase in dietary diversity  
37 score, CI 95% (-0.14 to 0.01,  $P=0.11$ ). A higher food insecurity score was also associated with  
38 reduced change in weight (mean difference -12.5 g per one-unit increase in food insecurity score,  
39 95% CI -23.9 to -1.1,  $P=0.03$ ).  
40  
41  
42  
43  
44  
45  
46  
47  
48  
49  
50  
51  
52  
53

## 54 DISCUSSION

55  
56  
57  
58  
59  
60

1  
2  
3 The purpose of the present study was to assess socioeconomic and dietary predictors of a  
4 child's short-term weight gain in a sub-Saharan region of Burkina Faso. Food insecurity was  
5 significantly associated with decreased weight gain velocity and change in weight. These  
6 findings suggest that children in households experiencing food insecurity are at higher risk of  
7 poor weight gain, which could result in malnutrition and lead to serious consequences for their  
8 physical and mental development [16]. These results are consistent with previous literature,  
9 which shows a negative association between higher food insecurity and lower dietary diversity  
10 and child's nutritional status [3, 9]. It is important to note that our study was conducted during  
11 the lean season in the sub-Saharan. These results could be explained by the lack of nutrient dense  
12 foods available during that time period. Previous studies indicate that during the lean season,  
13 staple dishes are more often bought ready-to-eat and usually contain fewer nutrients and raw  
14 ingredients in comparison to meals made during the Sahel's post-harvest season [17]. Based on  
15 the consistent dietary diversity score of 6 between the wasted and non-wasted groups of children,  
16 it is evident that the children's diets were not completely supplemented with all necessary  
17 micronutrients.  
18  
19  
20  
21  
22  
23  
24  
25  
26  
27  
28  
29  
30  
31  
32  
33  
34  
35  
36

37 Although the prevalence of wasting was lower than expected at one month [18], a  
38 number of variables were associated with wasting. Dietary diversity was associated with  
39 increased odds of wasting, a finding that was inconsistent with previous literature. Parents of  
40 children with malnutrition may have sought out treatment for their child, and in turn increased  
41 the child's dietary diversity in response to their malnourished state. In a previous study looking  
42 at dietary diversity and nutritional status, there was no association between wasting and dietary  
43 diversity at the baseline visit [4]. There was a strong association between health facility visits  
44 and increased odds of wasting, which possibly supports the hypothesis that parents of  
45  
46  
47  
48  
49  
50  
51  
52  
53  
54  
55  
56  
57  
58  
59  
60

1  
2  
3 malnourished children were more likely to seek healthcare for their child. As health care  
4 facilities have more resources to prevent adverse events, the visiting child may have had a lower  
5 likelihood of experiencing any illness that will inhibit their growth and health. It was also  
6 observed that animal ownership was associated with decreased odds of wasting. Households with  
7 greater resources may offset malnutrition during the lean season.  
8  
9  
10  
11  
12  
13

14  
15 This study should be considered in the context of its limitations. First, the study collected  
16 data via caregiver report, which could be subject to misclassification and bias [4]. The study  
17 villages were larger than other communities in the HDSS and only households with two or more  
18 children were included in the trial [4]. Thus, the results from this study may not be applicable to  
19 children from smaller households or smaller communities. This study was conducted over a span  
20 of only 35 days. Although the focus was to evaluate short-term weight gain in children, a longer  
21 time period would may reflect more accurate weight change. Future studies could evaluate  
22 weight changes over an entire lean season to understand the total effect of the lean season on  
23 nutrition outcomes. These findings may not be generalizable outside of regions with similar  
24 seasonal variation in food availability. Children included in this analysis were participating in a  
25 trial of antibiotics on the intestinal microbiome. Antibiotics may disrupt the pediatric  
26 microbiome and affect weight gain outcomes.[15, 19] However, all predictors were measured at  
27 baseline prior to randomization and we do not anticipate that they were different across  
28 randomization arms, and treatment was included as a covariate in models. Given that antibiotic  
29 use in this study was higher than would be anticipated outside of a trial of antibiotics [20],  
30 generalizability may be limited in settings where antibiotic use is very low.  
31  
32  
33  
34  
35  
36  
37  
38  
39  
40  
41  
42  
43  
44  
45  
46  
47  
48  
49  
50

51 In this study, we demonstrated that experiences of household food insecurity are  
52 associated with decreased weight gain in children in rural Burkina Faso during the lean season.  
53  
54  
55  
56  
57  
58  
59  
60

1  
2  
3 Children are particularly vulnerable to adverse nutrition outcomes during this period, and this  
4 study suggests that interventions that address food insecurity may be effective for reducing the  
5 incidence of malnutrition during the lean season. Understanding the relationship between food  
6 insecurity and anthropometric outcomes is crucial to developing policies and health programs to  
7 address these issues. Given that the determinants of weight gain may differ in different seasons,  
8 it is important for these policies to consider the seasonal variation of crops in agrarian  
9 communities and target interventions during the months where childhood malnutrition is most  
10 prevalent.  
11  
12  
13  
14  
15  
16  
17  
18  
19  
20  
21  
22  
23  
24  
25  
26  
27  
28  
29  
30  
31  
32  
33  
34  
35  
36  
37  
38  
39  
40  
41  
42  
43  
44  
45  
46  
47  
48  
49  
50  
51  
52  
53  
54  
55  
56  
57  
58  
59  
60

1  
2  
3 **Financial Support.** This work was supported in part by a Research to Prevent Blindness Career  
4 Development Award to C.E.O.  
5  
6

7 **Conflicts of Interest.** None to report.  
8  
9

10 **Author Contributions.** EGD: formulate research question, data analysis, writing the article. AS:  
11 formulating research question, designing study, implementation of study, critical review of  
12 article. LO: designing study, implementation of study, critical review of article. CD: designing  
13 study, implementation of study, critical review of article. CT: designing study, implementation of  
14 study, critical review of article. PZ: designing study, implementation of study, data analysis,  
15 critical review of article. TB: formulating research question, designing study, critical review of  
16 article. KSO: data analysis, critical review of article. EL: designing study, implementation of  
17 study, critical review of article. JDK: formulate research question, designing study,  
18 implementation of study, critical review of article. CEO: formulate research question, designing  
19 study, implementation of study, data analysis, writing article.  
20  
21  
22  
23  
24  
25  
26  
27  
28  
29  
30  
31  
32  
33  
34  
35  
36  
37  
38  
39  
40  
41  
42  
43  
44  
45  
46  
47  
48  
49  
50  
51  
52  
53  
54  
55  
56  
57  
58  
59  
60



**Table 1:** Baseline descriptive statistics of the study (N=246)

|                                                                                                | Not Wasted (MUAC<br>or WHZ > -2)<br>N= 232 | Wasted (MUAC or<br>WHZ < -2)<br>N= 14 | Overall                  |
|------------------------------------------------------------------------------------------------|--------------------------------------------|---------------------------------------|--------------------------|
| Age, months, median<br>(IQR)                                                                   | 37.5<br>(25 to 50)                         | 37<br>(23 to 46)                      | 37<br>(23 to 49)         |
| Female sex, N (%)                                                                              | 115 (49.6%)                                | 7 (50.0%)                             | 122 (49.6%)              |
| Male sex, N (%)                                                                                | 117 (50.4%)                                | 7 (50.0%)                             | 124 (50.4%)              |
| Weight, kg, median<br>(IQR)                                                                    | 12.85<br>(10.9 to 14.75)                   | 9.775<br>(8.65 to 10.8)               | 12.6<br>(10.75 to 14.6)  |
| WHZ, median (IQR)                                                                              | -0.18<br>(-0.91 to 0.4)                    | -2.29<br>(-2.43 to -2.2)              | -0.21<br>(-1.04 to 0.36) |
| Number of times went to<br>bed hungry due to not<br>enough food, last 35<br>days, median (IQR) | 0<br>(0 to 0)                              | 0<br>(0 to 3)                         | 0<br>(0 to 0)            |
| Had limited food                                                                               | 50 (21.6%)                                 | 5 (35.7%)                             | 55 (22.4%)               |
| Went to bed hungry, last<br>35 days, N (%)                                                     | 28 (12.1%)                                 | 2 (14.9%)                             | 30 (12.2%)               |
| Visited healthcare facility<br>in past 30 days, N (%)                                          | 32 (14.2%)                                 | 7 (50.0%)                             | 39 (16.3%)               |
| Dietary diversity score,<br>median (IQR)                                                       | 6<br>(4 to 7)                              | 6<br>(5 to 7)                         | 6<br>(4 to 7)            |
| Breastfeeding status, N<br>(%)                                                                 | 49 (21.1%)                                 | 5 (35.7%)                             | 54 (22.0%)               |
| Number of animals<br>owned by household,<br>median (IQR)                                       | 13<br>(6 to 28)                            | 24.5<br>(6 to 54)                     | 13<br>(6 to 29.5)        |
| Household latrine<br>ownership, N (%)                                                          |                                            |                                       |                          |
| Bush                                                                                           | 82 (35.3%)                                 | 3 (21.4%)                             | 85 (34.6%)               |
| Slab                                                                                           | 70 (30.2%)                                 | 7 (50.0%)                             | 77 (31.3%)               |
|                                                                                                | 80 (34.5%)                                 | 4 (28.5%)                             | 84 (34.4%)               |

| Slab                                     | No                     |                         |                        |
|------------------------------------------|------------------------|-------------------------|------------------------|
| Change in weight, median (IQR)           | 350<br>(50 to 600)     | 185<br>(-50 to 500)     | 310<br>(50 to 600)     |
| Grams per kilogram per day, median (IQR) | 0.71<br>(0.12 to 1.36) | 0.61<br>(-0.14 to 1.44) | 0.70<br>(0.12 to 1.37) |

For peer review only

1  
2  
3  
4  
5  
6  
7  
8  
9  
10  
11  
12  
13  
14  
15  
16  
17  
18  
19  
20  
21  
22  
23  
24  
25  
26  
27  
28  
29  
30  
31  
32  
33  
34  
35  
36  
37  
38  
39  
40  
41  
42  
43  
44  
45  
46  
47

**Table 2: Weight for Height Z Score and Wasting Status at Day 35**

|                            | Weight for Height Z-score |         |                           |         | Wasted at Day 35     |         |                     |         |
|----------------------------|---------------------------|---------|---------------------------|---------|----------------------|---------|---------------------|---------|
|                            | Bivariate                 |         | Multivariable             |         | Bivariate            |         | Multivariable       |         |
|                            | Effect Size (95% CI)      | P-value | Effect Size (95% CI)      | P-value | OR (95% CI)          | P-value | aOR (95% CI)        | P-value |
| Age                        | 0.011 (0.003 to 0.020)    | 0.01    | 0.004 (-0.005 to 0.012)   | 0.43    | 0.97 (0.93 to 1.01)  | 0.12    | 0.96 (0.87 to 1.1)  | 0.50    |
| Sex                        | -0.17 (-0.43 to 0.10)     | 0.22    | 0.02 (-0.16 to 0.21)      | 0.80    | 0.98 (0.33 to 2.92)  | 0.98    | 0.27 (0.02 to 3.3)  | 0.31    |
| Dietary diversity          | 0.02 (-0.053 to 0.098)    | .56     | 0.02 (-0.038 to 0.07)     | 0.55    | 1.2 (0.99 to 1.55)   | 0.07    | 1.6 (0.92 to 2.8)   | .10     |
| Food insecurity            | -0.02 (-0.041 to 0.01)    | 0.16    | -0.01 (-0.021 to 0.009)   | 0.40    | 1.1 (0.98 to 1.13)   | 0.18    | 1.3 (1.1 to 1.5)    | .01     |
| Breastfeeding              | -0.48 (-0.79 to -0.18)    | .002    | -0.06 (-0.36 to 0.24)     | 0.68    | 2.1 (0.66 to 6.53)   | 0.21    | 0.20 (0.01 to 3.6)  | 0.28    |
| Health facility visit      | -0.45 (-0.82 to -0.071)   | 0.02    | -0.17 (-0.43 to 0.08)     | 0.18    | 6.1 (1.98 to 18.54)  | 0.002   | 2.9 (0.6 to 15.6)   | 0.21    |
| WHZ, Baseline              | 0.62 (0.46 to 0.77)       | <0.001  | 0.58 (0.42 to 0.74)       | <0.001  | 0.08 (0.028 to 0.24) | <0.001  | 0.04 (0.01 to 0.12) | <0.001  |
| Animals                    | -0.002 (-0.007 to 0.003)  | 0.39    | -0.0007 (-0.003 to 0.002) | 0.59    | 1.01 (1.00 to 1.02)  | 0.01    | 0.99 (0.95 to 1.04) | 0.80    |
| Latrine<br>None<br>No slab | 0.032 (-.29 to 0.36)      | 0.85    | -0.02 (-0.26 to 0.22)     | 0.87    | 1.4 (0.30 to 6.1)    | 0.68    | 1.5 (0.08 to 26.4)  | 0.79    |

|      |                      |      |                      |      |                    |      |                      |      |
|------|----------------------|------|----------------------|------|--------------------|------|----------------------|------|
| Slab | 0.15 (-0.17 to 0.48) | 0.35 | 0.21 (-0.02 to 0.46) | 0.08 | 2.7 (0.70 to 10.6) | 0.15 | 11.7 (0.36 to 377.4) | 0.17 |
|------|----------------------|------|----------------------|------|--------------------|------|----------------------|------|

For peer review only

**Table 3:** Change in Weight and Weight gain velocity (g/kg/day)

|                       | Change in Weight           |         |                          |         | Weight gain velocity (g/kg/day) |         |                         |         |
|-----------------------|----------------------------|---------|--------------------------|---------|---------------------------------|---------|-------------------------|---------|
|                       | Bivariate                  |         | Multivariable            |         | Bivariate                       |         | Multivariable           |         |
|                       | Effect Size (95% CI)       | P-value | Effect Size (95% CI)     | P-value | OR (95% CI)                     | P-value | aOR (95% CI)            | P-value |
| Age                   | 2.4 (-5.30 to 10.11)       | .52     | -0.23 (-7.3 to 6.9)      | .95     | -0.005 (-0.024 to 0.013)        | 0.57    | -0.009 (-0.03 to 0.01)  | 0.27    |
| Sex                   | 32.8 (-81.97 to 147.51)    | 0.54    | 1.8 (-119.2 to 122.8)    | 0.98    | 0.14 (-0.18 to 0.45)            | 0.39    | 0.01 (-0.33 to 0.35)    | 0.95    |
| Dietary diversity     | -12.7 (-44.93 to 19.58)    | 0.44    | -20.6 (-55.7 to 14.5)    | 0.25    | -0.06 (-0.13 to .021)           | 0.16    | -0.06 (-0.14 to 0.01)   | 0.11    |
| Food insecurity       | -12.5 (-23.87 to -1.12)    | 0.03    | -15.0 (-27.2 to -2.9)    | 0.02    | -0.03 (-0.06 to -.005)          | 0.02    | -0.04 (-0.07 to -0.01)  | 0.01    |
| Breastfeeding         | -157.1 (-454.15 to 139.99) | 0.300   | -294.3 (-658.7 to 70.1)  | 0.11    | -0.06 (-0.79 to 0.68)           | 0.88    | -0.62 (-1.5 to 0.23)    | 0.15    |
| Health facility visit | -30.7 (-216.12 to 154.79)  | 0.74    | -41.6 (-252.7 to 169.4)  | .70     | -0.04 (-0.49 to 0.41)           | 0.86    | -0.15 (-0.64 to 0.35)   | 0.55    |
| WHZ, Baseline         | 137.0 (-239.47 to -34.45)  | 0.01    | -172.7 (-308.7 to -36.7) | 0.01    | -0.44 (-0.71 to -.16)           | 0.002   | -0.50 (-0.87 to -0.14)  | 0.01    |
| Animals               | -0.92 (-2.22 to 0.37)      | 0.16    | -1.6 (-3.1 to -0.13)     | 0.03    | -0.002 (-0.006 to .001)         | 0.19    | -0.004 (-0.01 to .0002) | 0.06    |

|         |                       |      |                        |      |                      |      |                      |      |  |
|---------|-----------------------|------|------------------------|------|----------------------|------|----------------------|------|--|
| Latrine |                       |      |                        |      |                      |      |                      |      |  |
| None    |                       |      |                        |      |                      |      |                      |      |  |
| No slab | -22.5 (-189.5 to      | 0.80 | 72.5 (-108.3 to 253.3) | 0.43 | -0.10 (-0.54 to .34) | 0.65 | 0.10 (-0.31 to 0.52) | 0.62 |  |
| Slab    | 144.5)                | 0.36 | 124.5 (-31.3 to 280.3) | 0.12 | 0.07 (-0.32 to .45)  | 0.74 | 0.16 (-0.21 to 0.53) | 0.39 |  |
|         | 65.5 (-74.4 to 205.4) |      |                        |      |                      |      |                      |      |  |

For peer review only

## REFERENCES

1. Rice AL, Sacco L, Hyder A, Black RE. Malnutrition as an underlying cause of childhood deaths associated with infectious diseases in developing countries. *Bull World Health Organ*. 2000.
2. Black RE, Victora CG, Walker SP, Bhutta ZA, Christian P, de Onis M, et al. Maternal and child undernutrition and overweight in low-income and middle-income countries. *Lancet*. 2013;382:427–51. [http://dx.doi.org/10.1016/S0140-6736\(13\)60937-X](http://dx.doi.org/10.1016/S0140-6736(13)60937-X).
3. Arimond M, Ruel MT. Dietary diversity is associated with child nutritional status: Evidence from 11 Demographic and Health Surveys. *J Nutr*. 2004;134:2579–85. [papers3://publication/uuid/E863A13F-E8B2-42AA-8455-7DCB3812908A](https://pubmed.ncbi.nlm.nih.gov/15111111/).
4. Sie A, Tapsoba C, Dah C, Ouermi L, Zabre P, Barnighausen T, et al. Dietary diversity and nutritional status among children in rural Burkina Faso. *Int Health*. 2018;382:426–7. <https://academic.oup.com/inthealth/advance-article/doi/10.1093/inthealth/ihy016/4951439>.
5. Mcquade ETR, Clark S, Bayo E, Scharf RJ, Deboer MD, Patil CL, et al. Seasonal Food Insecurity in Haydom , Tanzania , Is Associated with Low Birthweight and Acute Malnutrition : Results from the MAL-ED Study. 2018.
6. Hillbruner C, Egan R. Seasonality, household food security, and nutritional status in Dinajpur, Bangladesh. *Food Nutr Bull*. 2008.
7. Arsenault JE, Nikiema L, Allemand P, Ayassou KA, Lanou H, Moursi M, et al. Seasonal differences in food and nutrient intakes among young children and their mothers in rural Burkina Faso. *J Nutr Sci*. 2014.
8. Somé JW JA. The influence of crop production and socioeconomic factors on seasonal household dietary diversity in Burkina Faso. *PLoS One J*. 2018.
9. Sie A, Louis VR, Gbangou A, Muller O, Niamba L, Stieglbauer G, et al. The Health and Demographic Surveillance System (HDSS) in Nouna, Burkina Faso, 1993–2007. *Glob Health Action*. 2010;3:5284. <http://www.globalhealthaction.net/index.php/gha/article/view/5284>.
10. Oldenburg CE, Sie A, Coulibaly B, Ouermi L, Dah C, Tapsoba C, et al. Effect of commonly-used pediatric antibiotics on gut microbial diversity in preschool children in Burkina Faso: A randomized clinical trial. *Open Forum Infect Dis*. 2018;5:ofy289.
11. Sie A, Dah C, Ouermi L, Tapsoba C, Zabre P, Barnighausen T, et al. Effect of antibiotics on short-term growth among children in Burkina Faso: A randomized trial. *Am J Trop Med Hyg*. 2018;99:789–96. [papers3://publication/uuid/12563CE2-87EA-4BB3-9910-4ECF59F26A48](https://pubmed.ncbi.nlm.nih.gov/30111111/).
12. WHO Multicentre Growth Reference Study Group. WHO Child Growth Standards: Length/height-for-age, weight-for-age, weight-for-length, weight-for-height and body mass index-for-age: Methods and development. Geneva World Heal Organ. 2006;:312.
13. Kennedy G, Ballard T, Dop M. Guidelines for measuring household and individual dietary diversity . Food and Agriculture Organization of the United Nations; 2011. <http://www.fao.org/3/a-i1983e.pdf>.
14. Knueppel D, Demment M, Kaiser L. Validation of the Household Food Insecurity Access Scale in rural Tanzania. 2009;13:360–7.
15. Doan T, Arzika A, Ray KJ, Cotter SY, Kim J, Maliki R, et al. Gut microbial diversity in antibiotic-naïve children after systemic antibiotic exposure: a randomized controlled trial. *Clin Infect Dis*. 2017;64:1147–53. [papers3://publication/uuid/45ED2337-8E2A-4EC7-9886-6CF28191CEA6](https://pubmed.ncbi.nlm.nih.gov/29111111/).
16. Pozza L, Santos D, Denise I, Gigante P, Santos LPD&, Gigante DP. Relationship between

1  
2  
3 food insecurity and nutritional status of Brazilian children under the age of five. *Rev Bras*  
4 *Epidemiol.* 2013.

5 17. Becquey E, Delpeuch F, Konaté AM, Delsol H, Lange M, Zoungrana M, et al. Seasonality of  
6 the dietary dimension of household food security in urban Burkina Faso. *Br J Nutr.* 2012.

7 18. Akombi BJ, Agho KE, Merom D, Renzaho AM, Hall J. Child malnutrition in sub-Saharan  
8 Africa : A meta-analysis of demographic and health surveys ( 2006-2016 ). 2017;:1–11.

9 19. Bokulich NA, Chung J, Battaglia T, Henderson N, Jay M, Li H, et al. Antibiotics, birth  
10 mode, and diet shape microbiome maturation during early life. *Sci Transl Med.* 2016;8:343ra82-  
11 343ra82. <http://stm.sciencemag.org/lookup/doi/10.1126/scitranslmed.aad7121>.

12 20. Sie A, Coulibaly B, Adama S, Ouermi L, Dah C, Tapsoba C, et al. Antibiotic prescriptions  
13 among children younger than 5 years in Nouna District, Burkina Faso. *Am J Trop Med Hyg.*  
14 2019;In press.  
15  
16  
17  
18  
19  
20  
21  
22  
23  
24  
25  
26  
27  
28  
29  
30  
31  
32  
33  
34  
35  
36  
37  
38  
39  
40  
41  
42  
43  
44  
45  
46  
47  
48  
49  
50  
51  
52  
53  
54  
55  
56  
57  
58  
59  
60



**STROBE 2007 (v4) Statement—Checklist of items that should be included in reports of *cohort studies***

| Section/Topic                | Item # | Recommendation                                                                                                                                                                       | Reported on page # |
|------------------------------|--------|--------------------------------------------------------------------------------------------------------------------------------------------------------------------------------------|--------------------|
| <b>Title and abstract</b>    | 1      | (a) Indicate the study's design with a commonly used term in the title or the abstract                                                                                               | 1                  |
|                              |        | (b) Provide in the abstract an informative and balanced summary of what was done and what was found                                                                                  | 2                  |
| <b>Introduction</b>          |        |                                                                                                                                                                                      |                    |
| Background/rationale         | 2      | Explain the scientific background and rationale for the investigation being reported                                                                                                 | 4-5                |
| Objectives                   | 3      | State specific objectives, including any prespecified hypotheses                                                                                                                     | 5                  |
| <b>Methods</b>               |        |                                                                                                                                                                                      |                    |
| Study design                 | 4      | Present key elements of study design early in the paper                                                                                                                              | 6                  |
| Setting                      | 5      | Describe the setting, locations, and relevant dates, including periods of recruitment, exposure, follow-up, and data collection                                                      | 5-6                |
| Participants                 | 6      | (a) Give the eligibility criteria, and the sources and methods of selection of participants. Describe methods of follow-up                                                           | 6                  |
|                              |        | (b) For matched studies, give matching criteria and number of exposed and unexposed                                                                                                  | n/a                |
| Variables                    | 7      | Clearly define all outcomes, exposures, predictors, potential confounders, and effect modifiers. Give diagnostic criteria, if applicable                                             | 6                  |
| Data sources/<br>measurement | 8*     | For each variable of interest, give sources of data and details of methods of assessment (measurement). Describe comparability of assessment methods if there is more than one group | 7                  |
| Bias                         | 9      | Describe any efforts to address potential sources of bias                                                                                                                            | 8                  |
| Study size                   | 10     | Explain how the study size was arrived at                                                                                                                                            | 8                  |
| Quantitative variables       | 11     | Explain how quantitative variables were handled in the analyses. If applicable, describe which groupings were chosen and why                                                         | 8                  |
| Statistical methods          | 12     | (a) Describe all statistical methods, including those used to control for confounding                                                                                                | 8                  |
|                              |        | (b) Describe any methods used to examine subgroups and interactions                                                                                                                  | n/a                |
|                              |        | (c) Explain how missing data were addressed                                                                                                                                          | n/a                |
|                              |        | (d) If applicable, explain how loss to follow-up was addressed                                                                                                                       | n/a                |
|                              |        | (e) Describe any sensitivity analyses                                                                                                                                                | n/a                |
| <b>Results</b>               |        |                                                                                                                                                                                      |                    |

|                          |     |                                                                                                                                                                                                                                                                                                                                                                                                               |                   |
|--------------------------|-----|---------------------------------------------------------------------------------------------------------------------------------------------------------------------------------------------------------------------------------------------------------------------------------------------------------------------------------------------------------------------------------------------------------------|-------------------|
| Participants             | 13* | (a) Report numbers of individuals at each stage of study—eg numbers potentially eligible, examined for eligibility, confirmed eligible, included in the study, completing follow-up, and analysed<br>(b) Give reasons for non-participation at each stage<br>(c) Consider use of a flow diagram                                                                                                               | 8-9               |
| Descriptive data         | 14* | (a) Give characteristics of study participants (eg demographic, clinical, social) and information on exposures and potential confounders<br>(b) Indicate number of participants with missing data for each variable of interest<br>(c) Summarise follow-up time (eg, average and total amount)                                                                                                                | 8-9<br>n/a<br>8-9 |
| Outcome data             | 15* | Report numbers of outcome events or summary measures over time                                                                                                                                                                                                                                                                                                                                                | 9                 |
| Main results             | 16  | (a) Give unadjusted estimates and, if applicable, confounder-adjusted estimates and their precision (eg, 95% confidence interval). Make clear which confounders were adjusted for and why they were included<br>(b) Report category boundaries when continuous variables were categorized<br>(c) If relevant, consider translating estimates of relative risk into absolute risk for a meaningful time period | 9<br>n/a<br>n/a   |
| Other analyses           | 17  | Report other analyses done—eg analyses of subgroups and interactions, and sensitivity analyses                                                                                                                                                                                                                                                                                                                | n/a               |
| <b>Discussion</b>        |     |                                                                                                                                                                                                                                                                                                                                                                                                               |                   |
| Key results              | 18  | Summarise key results with reference to study objectives                                                                                                                                                                                                                                                                                                                                                      | 10-11             |
| <b>Limitations</b>       |     |                                                                                                                                                                                                                                                                                                                                                                                                               |                   |
| Interpretation           | 20  | Give a cautious overall interpretation of results considering objectives, limitations, multiplicity of analyses, results from similar studies, and other relevant evidence                                                                                                                                                                                                                                    | 11-12             |
| Generalisability         | 21  | Discuss the generalisability (external validity) of the study results                                                                                                                                                                                                                                                                                                                                         | 12                |
| <b>Other information</b> |     |                                                                                                                                                                                                                                                                                                                                                                                                               |                   |
| Funding                  | 22  | Give the source of funding and the role of the funders for the present study and, if applicable, for the original study on which the present article is based                                                                                                                                                                                                                                                 | 13                |

\*Give information separately for cases and controls in case-control studies and, if applicable, for exposed and unexposed groups in cohort and cross-sectional studies.

**Note:** An Explanation and Elaboration article discusses each checklist item and gives methodological background and published examples of transparent reporting. The STROBE checklist is best used in conjunction with this article (freely available on the Web sites of PLoS Medicine at <http://www.plosmedicine.org/>, Annals of Internal Medicine at <http://www.annals.org/>, and Epidemiology at <http://www.epidem.com/>). Information on the STROBE Initiative is available at [www.strobe-statement.org](http://www.strobe-statement.org).

# BMJ Open

## Short-term weight gain among preschool children in rural Burkina Faso: a secondary analysis of a randomized controlled trial

|                                 |                                                                                                                                                                                                                                                                                                                                                                                                                                                                                                                                                                                                                                                                                                                                                                                                                                |
|---------------------------------|--------------------------------------------------------------------------------------------------------------------------------------------------------------------------------------------------------------------------------------------------------------------------------------------------------------------------------------------------------------------------------------------------------------------------------------------------------------------------------------------------------------------------------------------------------------------------------------------------------------------------------------------------------------------------------------------------------------------------------------------------------------------------------------------------------------------------------|
| Journal:                        | <i>BMJ Open</i>                                                                                                                                                                                                                                                                                                                                                                                                                                                                                                                                                                                                                                                                                                                                                                                                                |
| Manuscript ID                   | bmjopen-2019-029634.R1                                                                                                                                                                                                                                                                                                                                                                                                                                                                                                                                                                                                                                                                                                                                                                                                         |
| Article Type:                   | Research                                                                                                                                                                                                                                                                                                                                                                                                                                                                                                                                                                                                                                                                                                                                                                                                                       |
| Date Submitted by the Author:   | 28-Jun-2019                                                                                                                                                                                                                                                                                                                                                                                                                                                                                                                                                                                                                                                                                                                                                                                                                    |
| Complete List of Authors:       | Dennis, Elena; University of California San Francisco, Francis I Proctor Foundation<br>Sie, Ali; Centre de Recherche en Sante de Nouna<br>Ouermi, Lucienne; Centre de Recherche en Sante de Nouna<br>Dah, Clarisse; Centre de Recherche en Sante de Nouna<br>Tapsoba, Charlemagne; Centre de Recherche en Sante de Nouna<br>Zabre, Pascal; Centre de Recherche en Sante de Nouna<br>Bärnighausen, Till ; Heidelberg University, Institute of Public Health<br>O'Brien, Kieran; University of California, San Francisco, Francis I. Proctor Foundation<br>Lebas, Elodie; University of California San Francisco, Francis I Proctor Foundation<br>Keenan, Jeremy; University of California, San Francisco, F.I. Proctor Foundation<br>Oldenburg, Catherine; University of California San Francisco, Francis I Proctor Foundation |
| <b>Primary Subject Heading</b>: | Paediatrics                                                                                                                                                                                                                                                                                                                                                                                                                                                                                                                                                                                                                                                                                                                                                                                                                    |
| Secondary Subject Heading:      | Global health, Epidemiology, Public health                                                                                                                                                                                                                                                                                                                                                                                                                                                                                                                                                                                                                                                                                                                                                                                     |
| Keywords:                       | nutritional status, food insecurity, Burkina Faso, Nutrition < TROPICAL MEDICINE                                                                                                                                                                                                                                                                                                                                                                                                                                                                                                                                                                                                                                                                                                                                               |
|                                 |                                                                                                                                                                                                                                                                                                                                                                                                                                                                                                                                                                                                                                                                                                                                                                                                                                |

SCHOLARONE™  
Manuscripts

1  
2  
3  
4 **Short-term weight gain among preschool children in rural Burkina Faso: a secondary**  
5 **analysis of a randomized controlled trial**  
6

7  
8 Elena G. Dennis<sup>1</sup>, Ali Sié<sup>2</sup>, Lucienne Ouermi<sup>2</sup>, Clarisse Dah<sup>2</sup>, Charlemagne Tapsoba<sup>2</sup>, Pascal  
9 Zabre<sup>2</sup>, Till Bärnighausen<sup>3,4,5</sup>, Kieran S. O'Brien<sup>1</sup>, Elodie Lebas<sup>1</sup>, Jeremy D. Keenan<sup>1,6</sup>,  
10 Catherine E. Oldenburg<sup>1,6,7</sup>  
11

12 <sup>1</sup>Francis I. Proctor Foundation, University of California, San Francisco, USA

13 <sup>2</sup>Centre de Recherche en Sante de Nouna, Nouna, Burkian Faso

14 <sup>3</sup>Heidelberg Institute for Global Health, Heidelberg, Germany

15 <sup>4</sup>Department of Global Health and Population, Harvard T.H. Chan School of Public Health,  
16 Boston, MA, USA

17 <sup>5</sup>Africa Health Research Institute, Somkhele, South Africa

18 <sup>6</sup>Department of Ophthalmology, University of California, San Francisco, USA

19 <sup>7</sup>Department of Epidemiology and Biostatistics, University of California, San Francisco, USA  
20  
21

22  
23 **Author for Correspondence:**

24 Catherine E. Oldenburg, ScD MPH  
25 513 Parnassus Ave, Room S347  
26 San Francisco, CA 94143  
27 Phone: 415-502-8843  
28 Email: catherine.oldenburg@ucsf.edu  
29

30  
31 **Word Count:** 3090

32 **Abstract Word Count:** 233

33 **Tables:** 4

34 **References:** 20  
35  
36  
37  
38  
39  
40  
41  
42  
43  
44  
45  
46  
47  
48  
49  
50  
51  
52  
53  
54  
55  
56  
57  
58  
59  
60

## ABSTRACT

**Objectives.** Nutrition has profound effects on children's health outcomes and is linked to weight gain and cognitive development. We used data from a randomized controlled trial to evaluate the prospective associations between dietary, socioeconomic, and demographic factors and short-term weight gain during the lean season in a rural area of Burkina Faso.

**Design.** Prospective cohort data arising from a randomized controlled trial of the effect of antibiotic distribution on child growth and intestinal microbial diversity.

**Setting.** Two rural communities in Nouna District, Burkina Faso.

**Participants.** 246 children aged 6-59 months living in the study communities were enrolled in the study.

**Primary and secondary outcome measures.** Anthropometric measurements, including weight and height, were obtained at baseline and one month.

**Results.** Of 246 children, the median weight for wasted children at baseline (WHZ < -2) was 9.78 kg (IQR 8.65 to 10.8) and the weight of non-wasted children was 12.85 kg (IQR 10.9 to 14.75). Food insecurity was significantly associated with decreased weight gain velocity (mean difference -0.03 g/kg/day, 95% CI -0.06 to -0.006,  $P=0.04$ ).

**Conclusion.** Experiences of household food insecurity before the beginning of the lean season were associated with decreased weight gain in children in rural Burkina Faso during the lean season, although the mean difference was small. Understanding the relationship between timing of food insecurity and anthropometric outcomes may help to develop policies and health programs that address both of these issues.

**Trial Registration.** ClinicalTrials.gov NCT03187834

**Key Words.** nutritional status; food insecurity; Burkina Faso

### Strengths and limitations of this study

- We used prospective data collected during the lean season in rural Burkina Faso to evaluate factors associated with weight gain in preschool children.
- Data were collected during the lean season in Burkina Faso, when children are at particularly high risk of malnutrition.
- Data were collected in a standardized fashion by trained anthropometrists.
- Limitations include the relatively small sample size and low prevalence of wasting, which may limit power particularly for analyses of factors associated with wasting.

## 1 BACKGROUND

2           Undernutrition is implicated in 50% of child deaths every year [1]. Nutrition has  
3 profound effects on health throughout the human life course and is inextricably linked to weight  
4 gain and cognitive development during early childhood [2]. In rural settings with insufficient  
5 resources, children are at greater risk of failing to reach their full growth and development  
6 potential [2]. Several cross-sectional studies have evaluated the underlying factors that contribute  
7 to malnutrition in an attempt to improve strategies to address the prevalence of child  
8 undernutrition, focusing primarily on nutrition-related determinants of growth. These studies  
9 identified several potential modifiable risk factors for undernutrition.

10           Dietary diversity is critical to ensure sufficient micronutrient intake [3]. Numerous  
11 studies have linked dietary diversity to nutritional status in children [4], finding that greater  
12 diversity is associated with a greater likelihood of meeting nutrient requirements and positive  
13 health outcomes [3]. In a study using data from 11 Health and Demographic surveys, dietary  
14 diversity was significantly associated with increased height-for-age Z-score (HAZ) in 7 countries  
15 [3], indicating that dietary diversity is important for a child's long-term nutritional status.

16           Food insecurity is associated with lower dietary diversity and poorer child health  
17 outcomes [5]. Food insecurity has a wide range of causes, including low socioeconomic status  
18 and seasonal variation in food availability [6]. In sub-Saharan Africa and particularly in rural,  
19 agrarian areas, the dependence on rainfall and the abundance of subsistence farming create  
20 seasonal variations in food availability [7]. In the Sahel region, many experience a "lean season"  
21 during seasonal rains, typically April to August. Conversely, these populations also experience a  
22 drier post-harvest season from January through March [7]. Seasonal variation in rainfall  
23 contributes to an increase in morbidity such as malaria, diarrhea, and upper and lower respiratory

1  
2  
3 24 infections. These diseases can impact a child's nutritional status by increasing their nutritional  
4  
5 25 needs and decreasing their appetite [7]. A study conducted in Burkina Faso found that the  
6  
7  
8 26 diversity of household diets was greater throughout all seasons with higher food expenditures,  
9  
10 27 greater crop production and sale and with a household head educated at the post-secondary level  
11  
12 28 [8].

13  
14 29 Although multiple cross-sectional studies have evaluated the association between dietary  
15  
16 30 diversity and sociodemographic factors and nutritional status, fewer studies have examined  
17  
18 31 factors influencing weight gain in young children prospectively. Cross-sectional studies are  
19  
20 32 limited by inability to determine temporality, and potential predictors may be influenced by  
21  
22 33 outcomes of interest. Here, we used data from a randomized controlled trial to evaluate the  
23  
24 34 prospective associations between dietary, socioeconomic, and demographic factors to identify  
25  
26 35 possible modifiable risk factors for short-term weight gain during the beginning of the lean  
27  
28 36 season in a rural area of Burkina Faso.

## 37 38 **METHODS**

### 39 **Study Setting**

40 40 This study was conducted in the Nouna Health and Demographic Surveillance Site  
41  
42 41 (HDSS) in the sub-Saharan villages of Kamadena and Dara in rural northwestern Burkina Faso.  
43  
44 42 The HDSS represents roughly one-quarter of the Nouna Health District in terms of surface and  
45  
46 43 population, and the population is primarily made up of cattle keepers and subsistence farmers [9].  
47  
48 44 This study was conducted from July through August 2017, during the beginning of the rainy  
49  
50 45 season in Burkina Faso, which lasts from July through October. The rainy season coincides with  
51  
52 46 peak malaria and malnutrition in the Sahel and sub-Saharan. This study was reviewed and approved  
53  
54  
55  
56  
57  
58  
59



1  
2  
3 47 by the Committee on Human Research at the University of California, San Francisco (Protocol  
4  
5 48 17-22036) and the Comité Institutionnel d’Ethique at the Centre de Recherche en Santé de  
6  
7 49 Nouna (CRSN; Protocol 2017-05-/CIE/CRSN). The caregiver of each child enrolled in the study  
8  
9 50 provided written informed consent.  
10  
11  
12  
13

## 14 52 **Participants & Procedures**

15  
16  
17 53 Data for the present analysis arose from a randomized controlled trial designed to assess  
18  
19 54 the effect of commonly-used childhood antibiotics on the composition of the intestinal  
20  
21 55 microbiome and anthropometry [10, 11]. In the parent trial, children ages 6-59 months in  
22  
23 56 households with two to three children at the most recent HDSS census were eligible for  
24  
25 57 participation. Households were excluded if one of the children was unable to participate in the  
26  
27 58 baseline assessment, due to illness or absence. If the household had two or three children, they  
28  
29 59 were all enrolled and anthropometric measures were taken. Children’s caregivers completed  
30  
31 60 assessments at the beginning of the study. After the baseline assessment, children were  
32  
33 61 randomized in a 1:1:1:1 fashion to a 5-day course of placebo, amoxicillin, azithromycin, or  
34  
35 62 cotrimoxazole [10]. All treatments were directly observed by study staff and administered as  
36  
37 63 pediatric oral suspension. Children were followed for 35 days from enrollment for  
38  
39 64 anthropometric outcomes [11]. All data was collected and managed in CommCare (Dimagi,  
40  
41 65 Cambridge, MA, USA).  
42  
43  
44  
45  
46  
47  
48

## 49 67 **Anthropometric Assessment**

50  
51 68 Height, weight, and mid-upper-arm circumference (MUAC) measurements were assessed  
52  
53 69 at baseline and at 35 days after enrollment. Children were weighed standing if able or in the arms  
54  
55  
56  
57  
58  
59  
60

1  
2  
3 70 of a caregiver, with heavy garments and jewelry removed. Recumbent length was measured in  
4  
5 71 children < 24 months of age and standing height in children > 24 months of age (Seca 874 flat  
6  
7 72 floor scale, Seca GMBH & Co.). Height and weight measurements were taken three times and  
8  
9 73 the median for each measure was used for analysis. The median of the three measurements was  
10  
11 74 used to avoid undue influence of outlying or implausible values. MUAC was measured a single  
12  
13 75 time. Weight-for-height (WHZ) and weight-for-age (WAZ) Z-scores were calculated based on  
14  
15 76 2006 World Health Organization Child Growth Standards [12]. Change in weight, defined as the  
16  
17 77 mean difference, and weight gain velocity, defined as grams per kilogram per day (g/kg/day)  
18  
19 78 were also calculated. Wasting and underweight were defined as WHZ and WAZ < -2 SD,  
20  
21 79 respectively.  
22  
23  
24  
25  
26  
27

## 28 81 **Predictors**

29  
30 82 Age and sex were extracted from the HDSS database. Dietary diversity, food insecurity  
31  
32 83 status, breastfeeding status, health care facility visits, and animal and latrine ownership were  
33  
34 84 assessed at baseline by asking caregivers in their local dialect a variety of questions for each  
35  
36 85 topic. Breastfeeding status was determined by asking the caregiver if the child was currently  
37  
38 86 breastfeeding, and if so if the child was exclusively breastfeeding. Dietary diversity was  
39  
40 87 evaluated using a questionnaire that asked if the child had eaten a series of 11 food groups in the  
41  
42 88 past 7 days, including grains (millet, rice, sorghum), vitamin-A abundant foods (carrots, sweet  
43  
44 89 potatoes, squash), greens, mangoes/papayas, other fruits, vegetables, proteins (meat, poultry, or  
45  
46 90 fish), eggs, legumes, dairy products (milk, yogurt, cheese, etc.), fats (coconut milk, butter, oil  
47  
48 91 etc.), sugary beverages, fortified foods, and ready to eat supplementary or therapeutic foods [4,  
49  
50 92 13]. The answers were made into a composite dietary diversity score by categorizing the food  
51  
52  
53  
54  
55  
56  
57  
58  
59  
60

1  
2  
3 93 groups into 7 unique food groups, including starch, vitamin A-rich foods, other fruits and  
4  
5 94 vegetables, animal protein (e.g., meat, eggs, poultry, fish), legumes, dairy, and fat (e.g., oil,  
6  
7  
8 95 butter, other fat).[3] We then summed the number of food groups reported for each child by the  
9  
10 96 caregiver. The possible range was 0, for children who ate none of the food groups, to 11, for  
11  
12 97 children who ate foods from every food group. For each household, caregivers reported on three  
13  
14 98 questions regarding food insecurity, including the number of times in the past four weeks the  
15  
16 99 caregiver worried about not having enough food in the household, if a member had gone to bed  
17  
18  
19 100 hungry in the past four weeks and if a member had to eat limited amount of food because lack of  
20  
21  
22 101 resource in the previous four weeks [4, 14]. Breastfeeding status was measured by asking  
23  
24 102 caregivers if the child was breastfed and if so, if the child was exclusively breastfed. Caregivers  
25  
26 103 reported on the number of poultry, goats/sheep, and cows that their household owned. The total  
27  
28 104 number of animals was summed. Finally, each caregiver reported whether they had visited a  
29  
30  
31 105 health facility for their child in the past 30 days and on the sanitation installation most commonly  
32  
33 106 used by their household, categorized as none (open defecation), latrine with slab, or latrine  
34  
35 107 without slab. Finally, the child's randomization arm was included as a covariate in all models.  
36  
37  
38  
39

## 40 109 **Sample Size**

41  
42 110 The sample size calculation was based on the primary outcome of the trial, Simpson's  $\alpha$   
43  
44 111 diversity. A sample size of 30 children per arm was estimated to provide at least 80% power to  
45  
46 112 detect a 1.5-unit difference in Simpson's  $\alpha$  diversity based on a previous study in Niger.[15]  
47  
48

49 113

## 50 51 114 **Statistical Methods**

1  
2  
3 115 Descriptive statistics were calculated with medians and interquartile ranges for  
4  
5 116 continuous variables and proportions for categorical variables. To assess predictors of weight  
6  
7 117 gain in the one-month period, a bivariate model was built for each anthropometric outcome  
8  
9 118 (WHZ, WAZ, change in weight in grams, wasting and underweight status at day 35, and  
10  
11 119 g/kg/day) and each baseline predictor (including age, sex, dietary diversity score, food insecurity  
12  
13 120 score, latrine ownership, animal ownership, healthcare facility use, and breastfeeding status).  
14  
15 121 One model was built per outcome. Linear regression analyses were performed for the continuous  
16  
17 122 outcomes and a logistic regression analysis was run for the dichotomous outcome. Multivariable  
18  
19 123 models were then built for each anthropometric outcome with all candidate predictor variables,  
20  
21 124 including child's sex, age, baseline WHZ, food insecurity, healthcare facility usage, dietary  
22  
23 125 diversity score, breastfeeding status, animal ownership, and latrine ownership. Standard errors of  
24  
25 126 all regression models were adjusted for clustering at the household level. Children with  
26  
27 127 implausible weight changes between baseline and one-month measurements (gained or lost more  
28  
29 128 than 2 kg) were assumed to be data entry errors (for example, the wrong child was measured),  
30  
31 129 and were excluded from analyses. All analyses were performed in Stata 15.1 (StataCorp, College  
32  
33 130 Station, TX, USA).

34  
35  
36  
37  
38  
39  
40 131

## 41 132 **Patient and Public Involvement**

42  
43 133 This study recruited a population-based sample of the general population, and thus no  
44  
45 134 patients were involved in the study. Leaders of the study communities were involved in  
46  
47 135 informing residents about the study, recruiting children and families to participate, and  
48  
49 136 facilitating follow-up visits.

50  
51  
52  
53  
54 137

## 138 RESULTS

139 For the trial, 165 households were assessed for eligibility and 41 were excluded because  
140 two children were not present in the household. The remaining 124 households were eligible for  
141 inclusion and were enrolled in the study [11]. A total of 248 children were enrolled in the study,  
142 of whom 233 had eligible anthropometric measurements at baseline and four weeks after  
143 treatment. Table 1 lists baseline descriptive statistics from the analysis. From the total number of  
144 children, 49.6% were female and the median age was 37 months (IQR 23 to 49). The mean  
145 baseline weight for children with WHZ < -2 was 9.7 kg (SD 1.3) compared to non-wasted 12.8  
146 kg (SD 2.8) in non-wasted children. Approximately 50% of caregivers with wasted children  
147 reported that they visited a health care facility in the past 30 days. The median dietary diversity  
148 score was 6 for both groups, non-wasted (IQR 4 to 7) and wasted (IQR 5 to 7). Households with  
149 a wasted child owned a median of 24.5 animals (IQR 6 to 54) while the families of non-wasted  
150 children owned a median of 13 (6 to 28). More wasted children were breastfed (35.7%)  
151 compared to non-wasted children (21.1%).

152 From baseline to one month, 219 non-wasted children gained a mean of 334 grams (SD  
153 485), and weight gain velocity was 0.82 g/kg/day (SD 1.2). The median WHZ at one month after  
154 baseline was -0.37 SD (SD 0.98), and 6.0% of children were wasted. Caregivers of five children  
155 reported that their child received antibiotics outside of the study treatment during the course of  
156 the study.

157 Table 2 lists a series of bivariate and multivariable models depicting the association  
158 between candidate predictor variables and WHZ and wasting status one month after baseline.  
159 The only significant predictor of WHZ at one month was baseline WHZ. In a bivariate model,  
160 children who had visited the health facility in the past month had increased odds of wasting (aOR

1  
2  
3 161 5.66, 95% CI 1.85 to 17.3,  $P=0.001$ ), and children living in households owning greater numbers  
4  
5 162 of animals had increased odds of wasting (aOR 1.01 per one additional animal owned by the  
6  
7 163 household, 95% CI 1.00 to 1.02,  $P=0.005$ ). However, wasting at one month was relatively  
8  
9 164 uncommon and confidence intervals were wide, and animal ownership was not significant in the  
10  
11 165 multivariable models. There was a non-significant increase in risk of wasting in children living  
12  
13 166 in households with higher levels of food insecurity (aOR 1.32, 95% CI 1.00 to 1.74,  $P=0.05$ ). No  
14  
15 167 other variables were statistically significantly associated with WHZ or wasting four weeks after  
16  
17 168 baseline.

18  
19  
20  
21 169 Table 3 lists bivariate and multivariable models for the association between candidate  
22  
23 170 predictor variables and weight change and weight gain velocity during the one-month period. In  
24  
25 171 the multivariable model, children in households with higher food insecurity scores had decreased  
26  
27 172 weight gain velocity (mean difference -0.03 g/kg/day per one-unit increase in food insecurity,  
28  
29 173 95% CI -0.06 to -0.006,  $P=0.04$ ). Dietary diversity was not significantly associated with weight  
30  
31 174 gain velocity (mean difference -0.05 g/kg/day for every one-unit increase in dietary diversity  
32  
33 175 score, CI 95% (-0.16 to 0.05,  $P=0.29$ ). A higher food insecurity score was also associated with  
34  
35 176 reduced change in weight (mean difference -12.2 g per one-unit increase in food insecurity score,  
36  
37 177 95% CI -24.3 to -0.03,  $P=0.049$ ).

38  
39  
40  
41 178 Table 4 lists bivariate and multivariable models for the association between candidate  
42  
43 179 predictor variables and WAZ and underweight four weeks after baseline. Age was significantly  
44  
45 180 associated with WAZ in the multivariable model (mean difference -0.005 SD per one-month  
46  
47 181 increase in age, 95% CI -0.009 to -0.0008,  $P=0.02$ ). No other candidate predictors were  
48  
49 182 statistically significantly associated with WAZ or underweight.

50  
51  
52  
53  
54 183

## 184 **DISCUSSION**

185           The purpose of the present study was to assess socioeconomic and dietary predictors of a  
186 child's short-term weight gain in a sub-Saharan region of Burkina Faso to identify potential  
187 modifiable risk factors at the beginning of the lean season that may lead to better nutritional  
188 outcomes for preschool children. Food insecurity was the only independent predictor  
189 significantly associated with decreased weight gain velocity and change in weight. Food  
190 insecurity was measured over the 30-day period prior to the baseline assessment, which  
191 happened at the beginning of the lean season. These findings suggest that children in households  
192 experiencing food insecurity before the lean season are at higher risk of poor weight gain, which  
193 could result in malnutrition and lead to serious consequences for their physical and cognitive  
194 development [16]. These results are consistent with previous literature, which shows a negative  
195 association between higher food insecurity and lower dietary diversity with a child's nutritional  
196 status [3, 9]. These results could be explained by the lack of nutrient dense foods available  
197 during and before the lean season, as food insecurity before the lean season is likely predictive of  
198 food insecurity during the lean season. Previous studies indicate that during the lean season,  
199 staple dishes are more often bought ready-to-eat and usually contain fewer nutrients and raw  
200 ingredients in comparison to meals made during the Sahel's post-harvest season [17]. The results  
201 of this study suggest that food insecurity, above and beyond other potential risk factors, is an  
202 important potentially modifiable risk factor for adverse nutritional outcomes. These findings  
203 underscore the importance of prioritizing policies related to improving food security in areas  
204 with seasonal malnutrition, as experiences of food insecurity immediately before the beginning  
205 of the lean season may predispose children to worse outcomes during the course of the lean

1  
2  
3 206 season. Interventions addressing food insecurity prior to the lean season, not only during the lean  
4  
5 207 season, may help improve outcomes for children during this vulnerable time.  
6

7  
8 208 The prevalence of wasting and underweight were lower than expected at one month [18],  
9  
10 209 limiting statistical power to detect risk factors for both conditions. Children who had visited a  
11  
12 210 health facility had increased odds of wasting and reduced WHZ at day 35, although this was not  
13  
14 211 statistically significant in multivariable models. This is likely reflective of parents seeking care  
15  
16 212 for malnourished children, and reduced weight gain was likely related to sick children gaining  
17  
18 213 less weight.  
19  
20

21 214 This study should be considered in the context of its limitations. First, the study collected  
22  
23 215 data via caregiver report, which could be subject to misclassification and bias [4]. The study  
24  
25 216 villages were larger than other communities in the HDSS and only households with two or more  
26  
27 217 children were included in the trial.[4] Thus, the results from this study may not be generalizable  
28  
29 218 to children from smaller households or smaller communities. These findings also may not be  
30  
31 219 generalizable outside of regions with similar seasonal variation in food availability. This study  
32  
33 220 was conducted over a span of only 35 days. Although the focus was to evaluate short-term  
34  
35 221 weight gain in children, a longer time period may reflect more accurate weight change, and  
36  
37 222 longer-term data would be useful to understand modifiable risk factors for nutritional outcomes.  
38  
39 223 Future studies could evaluate weight changes over an entire lean season to understand the total  
40  
41 224 effect of the lean season on nutrition outcomes. Children included in this analysis were  
42  
43 225 participating in a trial of antibiotics on the intestinal microbiome. Antibiotics may disrupt the  
44  
45 226 pediatric microbiome and affect weight gain outcomes [15, 19]. However, all predictors were  
46  
47 227 measured at baseline prior to randomization and we do not anticipate that they were different  
48  
49 228 across randomization arms, and treatment arm was included as a covariate in models. Few  
50  
51  
52  
53  
54  
55  
56  
57  
58  
59  
60



1  
2  
3 229 children were given antibiotics outside of the study treatment during the course of the study.  
4  
5 230 Such antibiotic use may be influenced by baseline characteristics and could potentially be a  
6  
7 231 mediator of any effect of baseline characteristics on nutritional outcomes. Given that antibiotic  
8  
9 232 use in this study area was higher than would be anticipated outside of a trial of antibiotics [20],  
10  
11 233 generalizability may be limited in settings where antibiotic use is very low. Finally, the sample  
12  
13 234 size of this study was limited. Larger prospective studies would have greater power to identify  
14  
15 235 potential risk factors for low weight gain.  
16  
17  
18

19 236 In this study, we demonstrated that experiences of household food insecurity prior to the  
20  
21 237 lean season are associated with decreased weight gain in children in rural Burkina Faso during  
22  
23 238 the lean season. Children are particularly vulnerable to adverse nutrition outcomes during this  
24  
25 239 period, and this study suggests that interventions that address food insecurity may be effective  
26  
27 240 for reducing the incidence of malnutrition during the lean season. Given that the determinants of  
28  
29 241 weight gain may differ in different seasons, such policies should consider the seasonal variation  
30  
31 242 of crops in agrarian communities and target interventions during the months prior to the  
32  
33 243 vulnerable season when malnutrition may develop.  
34  
35  
36  
37  
38  
39  
40  
41  
42  
43  
44  
45  
46  
47  
48  
49  
50  
51  
52  
53  
54  
55  
56  
57  
58  
59  
60

1  
2  
3 **Financial Support.** This work was supported in part by a Research to Prevent Blindness Career  
4 Development Award to C.E.O.  
5

6  
7  
8 **Conflicts of Interest.** None to report.  
9

10 **Author Contributions.** EGD: formulate research question, data analysis, writing the article. AS:  
11 formulating research question, designing study, implementation of study, critical review of  
12 article. LO: designing study, implementation of study, critical review of article. CD: designing  
13 study, implementation of study, critical review of article. CT: designing study, implementation of  
14 study, critical review of article. PZ: designing study, implementation of study, data analysis,  
15 critical review of article. TB: formulating research question, designing study, critical review of  
16 article. KSO: data analysis, critical review of article. EL: designing study, implementation of  
17 study, critical review of article. JDK: formulate research question, designing study,  
18 implementation of study, critical review of article. CEO: formulate research question, designing  
19 study, implementation of study, data analysis, writing article.  
20  
21  
22  
23  
24  
25  
26  
27  
28  
29  
30  
31  
32

33 **Data Availability.** No additional data available.  
34  
35  
36  
37  
38  
39  
40  
41  
42  
43  
44  
45  
46  
47  
48  
49  
50  
51  
52  
53  
54  
55  
56  
57  
58  
59  
60

**Table 1:** Baseline descriptive statistics of the study (N=246)

|                                                                                                | Not Wasted (MUAC<br>or WHZ > -2)<br>N= 232 | Wasted (MUAC or<br>WHZ < -2)<br>N= 14 | Overall<br>N=246 |
|------------------------------------------------------------------------------------------------|--------------------------------------------|---------------------------------------|------------------|
| Age, months, median<br>(IQR)                                                                   | 37.5<br>(25 to 50)                         | 37<br>(23 to 46)                      | 37<br>(23 to 49) |
| Female sex, N (%)                                                                              | 115 (49.6%)                                | 7 (50.0%)                             | 122 (49.6%)      |
| Male sex, N (%)                                                                                | 117 (50.4%)                                | 7 (50.0%)                             | 124 (50.4%)      |
| Weight, kg, mean (SD)                                                                          | 12.8 (2.8)                                 | 9.7 (1.3)                             | 12.7 (2.8)       |
| Height, cm, mean (SD)                                                                          | 90.9 (10.1)                                | 85.3 (6.9)                            | 90.6 (10.0)      |
| WHZ, mean (SD)                                                                                 | -0.31 (1.09)                               | -2.3 (0.50)                           | -0.42 (1.16)     |
| WAZ, mean (SD)                                                                                 | -0.85 (0.99)                               | -2.41 (0.80)                          | -0.94 (1.04)     |
| HAZ, mean (SD)                                                                                 | -1.13 (1.48)                               | -1.56 (1.16)                          | -1.16 (1.46)     |
| MUAC, mean (SD)                                                                                | 15.2 (1.10)                                | 13.7 (0.72)                           | 15.2 (1.14)      |
| Number of times went to<br>bed hungry due to not<br>enough food, last 35<br>days, median (IQR) | 0<br>(0 to 0)                              | 0<br>(0 to 3)                         | 0<br>(0 to 0)    |
| Had limited food                                                                               | 50 (21.6%)                                 | 5 (35.7%)                             | 55 (22.4%)       |
| Went to bed hungry, last<br>35 days, N (%)                                                     | 28 (12.1%)                                 | 2 (14.9%)                             | 30 (12.2%)       |
| Visited healthcare facility<br>in past 30 days, N (%)                                          | 32 (14.2%)                                 | 7 (50.0%)                             | 39 (16.3%)       |

1  
2  
3  
4  
5  
6  
7  
8  
9  
10  
11  
12  
13  
14  
15  
16  
17  
18  
19  
20  
21  
22  
23  
24  
25  
26  
27  
28  
29  
30  
31  
32  
33  
34  
35  
36  
37  
38  
39  
40  
41  
42  
43  
44  
45  
46  
47

|                                                    |                        |                         |                        |
|----------------------------------------------------|------------------------|-------------------------|------------------------|
| Dietary diversity score, median (IQR)              | 6<br>(4 to 7)          | 6<br>(5 to 7)           | 6<br>(4 to 7)          |
| Any breastfeeding, N (%)                           | 49 (21.1%)             | 5 (35.7%)               | 54 (22.0%)             |
| Number of animals owned by household, median (IQR) | 13<br>(6 to 28)        | 24.5<br>(6 to 54)       | 13<br>(6 to 29.5)      |
| Household latrine ownership, N (%)                 |                        |                         |                        |
| Bush                                               | 82 (35.3%)             | 3 (21.4%)               | 85 (34.6%)             |
| Slab                                               | 70 (30.2%)             | 7 (50.0%)               | 77 (31.3%)             |
| No Slab                                            | 80 (34.5%)             | 4 (28.5%)               | 84 (34.4%)             |
| Change in weight, median (IQR)                     | 350<br>(50 to 600)     | 185<br>(-50 to 500)     | 310<br>(50 to 600)     |
| Grams per kilogram per day, median (IQR)           | 0.71<br>(0.12 to 1.36) | 0.61<br>(-0.14 to 1.44) | 0.70<br>(0.12 to 1.37) |
| Underweight at day 35, N (%)                       | 14 (6.0%)              | 8 (57.1%)               | 22 (8.9%)              |

**Table 2:** Bivariate and multivariable models of weight-for-height Z-score and wasting at day 35

|                                | Weight for Height Z-score |         |                           |         | Wasted at Day 35    |         |                        |         |
|--------------------------------|---------------------------|---------|---------------------------|---------|---------------------|---------|------------------------|---------|
|                                | Bivariate                 |         | Multivariable             |         | Bivariate           |         | Multivariable          |         |
|                                | Effect Size (95% CI)      | P-value | Effect Size (95% CI)      | P-value | OR (95% CI)         | P-value | aOR (95% CI)           | P-value |
| Age                            | 0.01 (0.001 to 0.02)      | 0.03    | 0.003 (-0.01 to 0.004)    | 0.45    | 0.97 (0.93 to 1.01) | 0.12    | 0.99 (0.87 to 1.13)    | 0.90    |
| Sex                            | -0.19 (-0.45 to 0.07)     | 0.14    | 0.03 (-0.10 to 0.16)      | 0.63    | 0.97 (0.33 to 2.89) | 0.96    | 0.18 (0.001 to 28.4)   | 0.51    |
| Dietary diversity <sup>1</sup> | 0.005 (-0.09 to 0.10)     | 0.91    | -0.03 (-0.07 to 0.02)     | 0.24    | 1.48 (1.00 to 2.18) | 0.05    | 3.00 (0.69 to 13.1)    | 0.14    |
| Food insecurity <sup>2</sup>   | -0.02 (-0.04 to 0.009)    | 0.21    | -0.01 (-0.02 to 0.003)    | 0.12    | 1.05 (0.97 to 1.12) | 0.21    | 1.32 (1.00 to 1.74)    | 0.05    |
| Breastfeeding                  | -0.43 (-0.74 to -0.13)    | 0.006   | -0.06 (-0.31 to 0.19)     | 0.63    | 1.98 (0.63 to 6.23) | 0.24    | 0.07 (0.003 to 1.34)   | 0.08    |
| Health facility visit          | -0.41 (-0.78 to 0.04)     | 0.03    | -0.06 (-0.28 to 0.15)     | 0.55    | 5.66 (1.85 to 17.3) | 0.001   | 10.2 (1.08 to 97.0)    | 0.04    |
| WHZ, Baseline                  | 0.68 (0.59 to 0.77)       | <0.001  | 0.81 (0.72 to 0.89)       | <0.001  | 0.16 (0.08 to 0.33) | <0.001  | 0.005 (0.0003 to 0.07) | <0.001  |
| Animals                        | -0.003 (-0.008 to 0.002)  | 0.28    | -0.002 (-0.004 to 0.0003) | 0.09    | 1.01 (1.00 to 1.02) | 0.005   | 0.98 (0.95 to 1.02)    | 0.41    |
| Latrine                        |                           |         |                           |         |                     |         |                        |         |
| None                           |                           |         |                           |         |                     |         |                        |         |
| No slab                        | 0.02 (-0.32 to 0.36)      | 0.91    | 0.01 (-0.16 to 0.19)      | 0.89    | 1.37 (0.30 to 6.14) | 0.68    | 2.05 (0.05 to 81.3)    | 0.70    |
| Slab                           | 0.012 (-0.20 to 0.44)     | 0.45    | 0.09 (-0.09 to 0.26)      | 0.35    | 2.73 (0.70 to 10.6) | 0.15    | 16.1 (0.12 to 2220.7)  | 0.27    |

1  
2  
3 Abbreviations: CI, confidence interval; OR, odds ratio, WHZ, weight-for-height Z-score; <sup>1</sup>Operationalized as a composite score of 7  
4 food groups eaten over the past 7 days; <sup>2</sup>Operationalized as a composite score of three questions related to frequency of food  
5 insecurity over the past four weeks.  
6  
7  
8  
9  
10  
11  
12  
13  
14  
15  
16  
17  
18  
19  
20  
21  
22  
23  
24  
25  
26  
27  
28  
29  
30  
31  
32  
33  
34  
35  
36  
37  
38  
39  
40  
41  
42  
43  
44  
45  
46  
47

For peer review only

**Table 3:** Bivariate and multivariable predictors of change in weight and weight gain velocity at day 35

|                       | Change in Weight (grams) |         |                          |         | Weight gain velocity (g/kg/day) |         |                           |         |
|-----------------------|--------------------------|---------|--------------------------|---------|---------------------------------|---------|---------------------------|---------|
|                       | Bivariate                |         | Multivariable            |         | Bivariate                       |         | Multivariable             |         |
|                       | Effect Size (95% CI)     | P-value | Effect Size (95% CI)     | P-value | Effect Size (95% CI)            | P-value | Effect Size (95% CI)      | P-value |
| Age                   | -1.8 (-5.4 to 1.8)       | 0.33    | -1.69 (-8.3 to 5.0)      | 0.62    | -0.005 (-0.024 to 0.013)        | 0.57    | -0.01 (-0.03 to 0.003)    | 0.12    |
| Sex                   | 12.8 (-100.3 to 125.8)   | 0.82    | 13.0 (-114.2 to 140.1)   | 0.84    | 0.14 (-0.18 to 0.45)            | 0.39    | 0.13 (-0.17 to 0.42)      | 0.39    |
| Dietary diversity     | -18.3 (-62.5 to 25.9)    | 0.42    | -11.1 (-57.6 to 35.4)    | 0.64    | -0.06 (-0.17 to 0.05)           | 0.29    | -0.05 (-0.16 to 0.05)     | 0.29    |
| Food insecurity       | -11.8 (-23.1 to -0.57)   | 0.04    | -12.2 (-24.3 to -0.03)   | 0.049   | -0.03 (-0.06 to -0.005)         | 0.02    | -0.03 (-0.06 to -0.006)   | 0.04    |
| Breastfeeding         | -6.46 (-123.4 to 110.4)  | 0.91    | -133.8 (-329.2 to 61.6)  | 0.18    | -0.06 (-0.79 to 0.68)           | 0.88    | -0.28 (-0.80 to 0.25)     | 0.30    |
| Health facility visit | -20.0 (-205.2 to 165.3)  | 0.83    | -64.7 (-286.9 to 157.4)  | 0.57    | -0.04 (-0.49 to 0.41)           | 0.86    | -0.20 (-0.70 to 0.30)     | 0.44    |
| WHZ                   | -82.3 (-139.2 to -25.5)  | 0.005   | -125.4 (-212.5 to -38.4) | 0.005   | -0.44 (-0.71 to -0.16)          | 0.002   | -0.37 (-0.60 to -0.15)    | 0.001   |
| Animals               | -0.77 (-2.02 to 0.49)    | 0.23    | -1.45 (-2.9 to -0.002)   | 0.05    | -0.002 (-0.006 to .001)         | 0.19    | -0.003 (-0.007 to 0.0008) | 0.12    |

|         |                       |      |                        |      |                      |      |                      |      |  |
|---------|-----------------------|------|------------------------|------|----------------------|------|----------------------|------|--|
| Latrine |                       |      |                        |      |                      |      |                      |      |  |
| None    |                       |      |                        |      |                      |      |                      |      |  |
| No slab | 4.0 (-160.8 to 168.8) | 0.96 | 42.0 (-132.6 to 216.7) | 0.64 | -0.10 (-0.54 to .34) | 0.65 | 0.12 (-0.30 to 0.54) | 0.56 |  |
| Slab    | 92.0 (-45.3 to 229.3) | 0.19 | 95.4 (-56.4 to 247.1)  | 0.22 | 0.07 (-0.32 to .45)  | 0.74 | 0.20 (-0.16 to 0.55) | 0.27 |  |

Abbreviations: CI, confidence interval; OR, odds ratio, WHZ, weight-for-height Z-score; <sup>1</sup>Operationalized as a composite score of 7 food groups eaten over the past 7 days; <sup>2</sup>Operationalized as a composite score of three questions related to frequency of food insecurity over the past four weeks.



**Table 4:** Bivariate and multivariable predictors of weight-for-age Z-score and underweight at day 35

|                       | Weight-for-Age Z-score      |         |                            |         | Underweight            |         |                     |         |
|-----------------------|-----------------------------|---------|----------------------------|---------|------------------------|---------|---------------------|---------|
|                       | Bivariate                   |         | Multivariable              |         | Bivariate              |         | Multivariable       |         |
|                       | Effect Size (95% CI)        | P-value | Effect Size (95% CI)       | P-value | OR (95% CI)            | P-value | aOR (95% CI)        | P-value |
| Age                   | -0.004 (-0.01 to 0.005)     | 0.38    | -0.005 (-0.009 to -0.0008) | 0.02    | 0.98 (0.94 to 1.01)    | 0.14    | 0.97 (0.93 to 1.02) | 0.32    |
| Sex                   | -0.12 (-0.38 to 0.14)       | 0.36    | 0.03 (-0.05 to 0.12)       | 0.44    | 0.88 (0.35 to 2.16)    | 0.77    | 0.93 (0.32 to 2.65) | 0.89    |
| Dietary diversity     | 0.02 (-0.07 to 0.11)        | 0.65    | -0.01 (-0.05 to 0.02)      | 0.36    | 0.93 (0.72 to 1.20)    | 0.56    | 0.89 (0.68 to 1.17) | 0.40    |
| Food insecurity       | -0.01 (-0.04 to 0.01)       | 0.27    | -0.008 (-0.02 to 0.0006)   | 0.07    | 0.99 (0.92 to 1.06)    | 0.81    | 1.03 (0.95 to 1.11) | 0.52    |
| Breastfeeding         | -0.008 (-0.33 to 0.31)      | 0.96    | -0.06 (-0.21 to 0.10)      | 0.49    | 1.80 (0.68 to 4.78)    | 0.24    | 0.71 (0.15 to 3.35) | 0.66    |
| Health facility visit | -0.23 (-0.56 to 0.10)       | 0.17    | -0.04 (-0.17 to 0.10)      | 0.60    | 1.15 (0.37 to 3.61)    | 0.81    | 0.63 (0.16 to 2.46) | 0.51    |
| WAZ, Baseline         | 0.93 (0.88 to 0.98)         | <0.001  | 0.92 (0.87 to 0.98)        | <0.001  | 0.004 (0.0004 to 0.06) | <0.001  | n/a <sup>3</sup>    |         |
| Animals               | -0.004 (-0.008 to -0.00001) | 0.05    | -0.001 (-0.002 to 0.00003) | 0.06    | 1.01 (0.00 to 1.02)    | 0.01    | 1.01 (1.00 to 1.02) | 0.09    |
| Latrine               |                             |         |                            |         |                        |         |                     |         |
| None                  |                             |         |                            |         |                        |         |                     |         |
| No slab               | 0.05 (-0.29 to 0.38)        | 0.78    | 0.03 (-0.09 to 0.14)       | 0.64    | 2.97 (0.94 to 9.35)    | 0.06    | 2.16 (0.63 to 7.41) | 0.22    |
| Slab                  | 0.15 (-0.19 to 0.48)        | 0.38    | 0.05 (-0.05 to 0.15)       | 0.33    | 1.92 (0.56 to 6.57)    | 0.30    | 1.89 (0.51 to 7.10) | 0.34    |

1  
2  
3  
4  
5  
6  
7  
8  
9  
10  
11  
12  
13  
14  
15  
16  
17  
18  
19  
20  
21  
22  
23  
24  
25  
26  
27  
28  
29  
30  
31  
32  
33  
34  
35  
36  
37  
38  
39  
40  
41  
42  
43  
44  
45  
46  
47

Abbreviations: CI, confidence interval; OR, odds ratio, WAZ, weight-for-age Z-score; <sup>1</sup>Operationalized as a composite score of 7 food groups eaten over the past 7 days; <sup>2</sup>Operationalized as a composite score of three questions related to frequency of food insecurity over the past four weeks; <sup>3</sup>Not included in model due to near perfect prediction of the outcome.

For peer review only

## REFERENCES

1. Rice AL, Sacco L, Hyder A, Black RE. Malnutrition as an underlying cause of childhood deaths associated with infectious diseases in developing countries. *Bull World Health Organ.* 2000.
2. Black RE, Victora CG, Walker SP, Bhutta ZA, Christian P, de Onis M, et al. Maternal and child undernutrition and overweight in low-income and middle-income countries. *Lancet.* 2013;382:427–51. [http://dx.doi.org/10.1016/S0140-6736\(13\)60937-X](http://dx.doi.org/10.1016/S0140-6736(13)60937-X).
3. Arimond M, Ruel MT. Dietary diversity is associated with child nutritional status: Evidence from 11 Demographic and Health Surveys. *J Nutr.* 2004;134:2579–85. [papers3://publication/uuid/E863A13F-E8B2-42AA-8455-7DCB3812908A](https://pubmed.ncbi.nlm.nih.gov/15111111/).
4. Sie A, Tapsoba C, Dah C, Ouermi L, Zabre P, Barnighausen T, et al. Dietary diversity and nutritional status among children in rural Burkina Faso. *Int Health.* 2018;382:426–7. <https://academic.oup.com/inthealth/advance-article/doi/10.1093/inthealth/ihy016/4951439>.
5. Mcquade ETR, Clark S, Bayo E, Scharf RJ, Deboer MD, Patil CL, et al. Seasonal Food Insecurity in Haydom , Tanzania , Is Associated with Low Birthweight and Acute Malnutrition : Results from the MAL-ED Study. 2018.
6. Hillbruner C, Egan R. Seasonality, household food security, and nutritional status in Dinajpur, Bangladesh. *Food Nutr Bull.* 2008.
7. Arsenault JE, Nikiema L, Allemand P, Ayassou KA, Lanou H, Moursi M, et al. Seasonal differences in food and nutrient intakes among young children and their mothers in rural Burkina Faso. *J Nutr Sci.* 2014.
8. Somé JW JA. The influence of crop production and socioeconomic factors on seasonal household dietary diversity in Burkina Faso. *PLoS One J.* 2018.
9. Sie A, Louis VR, Gbangou A, Muller O, Niamba L, Stieglbauer G, et al. The Health and Demographic Surveillance System (HDSS) in Nouna, Burkina Faso, 1993–2007. *Glob Health Action.* 2010;3:5284. <http://www.globalhealthaction.net/index.php/gha/article/view/5284>.
10. Oldenburg CE, Sie A, Coulibaly B, Ouermi L, Dah C, Tapsoba C, et al. Effect of commonly-used pediatric antibiotics on gut microbial diversity in preschool children in Burkina Faso: A randomized clinical trial. *Open Forum Infect Dis.* 2018;In press.
11. Sie A, Dah C, Ouermi L, Tapsoba C, Zabre P, Barnighausen T, et al. Effect of antibiotics on short-term growth among children in Burkina Faso: A randomized trial. *Am J Trop Med Hyg.* 2018;99:789–96. [papers3://publication/uuid/12563CE2-87EA-4BB3-9910-4ECF59F26A48](https://pubmed.ncbi.nlm.nih.gov/30111111/).
12. WHO Multicentre Growth Reference Study Group. WHO Child Growth Standards: Length/height-for-age, weight-for-age, weight-for-length, weight-for-height and body mass index-for-age: Methods and development. Geneva World Heal Organ. 2006;:312.
13. Kennedy G, Ballard T, Dop M. Guidelines for measuring household and individual dietary diversity . Food and Agriculture Organization of the United Nations; 2011. <http://www.fao.org/3/a-i1983e.pdf>.
14. Knueppel D, Demment M, Kaiser L. Validation of the Household Food Insecurity Access Scale in rural Tanzania. 2009;13:360–7.
15. Doan T, Arzika A, Ray KJ, Cotter SY, Kim J, Maliki R, et al. Gut microbial diversity in antibiotic-naïve children after systemic antibiotic exposure: a randomized controlled trial. *Clin Infect Dis.* 2017;64:1147–53. [papers3://publication/uuid/45ED2337-8E2A-4EC7-9886-6CF28191CEA6](https://pubmed.ncbi.nlm.nih.gov/29111111/).
16. Pozza L, Santos D, Denise I, Gigante P, Santos LPD&, Gigante DP. Relationship between

1  
2  
3 food insecurity and nutritional status of Brazilian children under the age of five. *Rev Bras*  
4 *Epidemiol.* 2013.

5 17. Becquey E, Delpeuch F, Konaté AM, Delsol H, Lange M, Zoungrana M, et al. Seasonality of  
6 the dietary dimension of household food security in urban Burkina Faso. *Br J Nutr.* 2012.

7 18. Akombi BJ, Agho KE, Merom D, Renzaho AM, Hall J. Child malnutrition in sub-Saharan  
8 Africa : A meta-analysis of demographic and health surveys ( 2006-2016 ). 2017;:1–11.

9 19. Bokulich NA, Chung J, Battaglia T, Henderson N, Jay M, Li H, et al. Antibiotics, birth  
10 mode, and diet shape microbiome maturation during early life. *Sci Transl Med.* 2016;8:343ra82-  
11 343ra82. <http://stm.sciencemag.org/lookup/doi/10.1126/scitranslmed.aad7121>.

12 20. Sie A, Coulibaly B, Adama S, Ouermi L, Dah C, Tapsoba C, et al. Antibiotic prescriptions  
13 among children younger than 5 years in Nouna District, Burkina Faso. *Am J Trop Med Hyg.*  
14 2019;In press.  
15  
16  
17  
18  
19  
20  
21  
22  
23  
24  
25  
26  
27  
28  
29  
30  
31  
32  
33  
34  
35  
36  
37  
38  
39  
40  
41  
42  
43  
44  
45  
46  
47  
48  
49  
50  
51  
52  
53  
54  
55  
56  
57  
58  
59  
60

**STROBE 2007 (v4) Statement—Checklist of items that should be included in reports of *cohort studies***

| Section/Topic                | Item # | Recommendation                                                                                                                                                                       | Reported on page # |
|------------------------------|--------|--------------------------------------------------------------------------------------------------------------------------------------------------------------------------------------|--------------------|
| <b>Title and abstract</b>    | 1      | (a) Indicate the study's design with a commonly used term in the title or the abstract                                                                                               | 1                  |
|                              |        | (b) Provide in the abstract an informative and balanced summary of what was done and what was found                                                                                  | 2                  |
| <b>Introduction</b>          |        |                                                                                                                                                                                      |                    |
| Background/rationale         | 2      | Explain the scientific background and rationale for the investigation being reported                                                                                                 | 4-5                |
| Objectives                   | 3      | State specific objectives, including any prespecified hypotheses                                                                                                                     | 5                  |
| <b>Methods</b>               |        |                                                                                                                                                                                      |                    |
| Study design                 | 4      | Present key elements of study design early in the paper                                                                                                                              | 6                  |
| Setting                      | 5      | Describe the setting, locations, and relevant dates, including periods of recruitment, exposure, follow-up, and data collection                                                      | 5-6                |
| Participants                 | 6      | (a) Give the eligibility criteria, and the sources and methods of selection of participants. Describe methods of follow-up                                                           | 6                  |
|                              |        | (b) For matched studies, give matching criteria and number of exposed and unexposed                                                                                                  | n/a                |
| Variables                    | 7      | Clearly define all outcomes, exposures, predictors, potential confounders, and effect modifiers. Give diagnostic criteria, if applicable                                             | 6                  |
| Data sources/<br>measurement | 8*     | For each variable of interest, give sources of data and details of methods of assessment (measurement). Describe comparability of assessment methods if there is more than one group | 7                  |
| Bias                         | 9      | Describe any efforts to address potential sources of bias                                                                                                                            | 8                  |
| Study size                   | 10     | Explain how the study size was arrived at                                                                                                                                            | 8                  |
| Quantitative variables       | 11     | Explain how quantitative variables were handled in the analyses. If applicable, describe which groupings were chosen and why                                                         | 8                  |
| Statistical methods          | 12     | (a) Describe all statistical methods, including those used to control for confounding                                                                                                | 8                  |
|                              |        | (b) Describe any methods used to examine subgroups and interactions                                                                                                                  | n/a                |
|                              |        | (c) Explain how missing data were addressed                                                                                                                                          | n/a                |
|                              |        | (d) If applicable, explain how loss to follow-up was addressed                                                                                                                       | n/a                |
|                              |        | (e) Describe any sensitivity analyses                                                                                                                                                | n/a                |
| <b>Results</b>               |        |                                                                                                                                                                                      |                    |

|                          |     |                                                                                                                                                                                                                                                                                                                                                                                                               |       |
|--------------------------|-----|---------------------------------------------------------------------------------------------------------------------------------------------------------------------------------------------------------------------------------------------------------------------------------------------------------------------------------------------------------------------------------------------------------------|-------|
| Participants             | 13* | (a) Report numbers of individuals at each stage of study—eg numbers potentially eligible, examined for eligibility, confirmed eligible, included in the study, completing follow-up, and analysed<br>(b) Give reasons for non-participation at each stage<br>(c) Consider use of a flow diagram                                                                                                               | 8-9   |
| Descriptive data         | 14* | (a) Give characteristics of study participants (eg demographic, clinical, social) and information on exposures and potential confounders<br>(b) Indicate number of participants with missing data for each variable of interest<br>(c) Summarise follow-up time (eg, average and total amount)                                                                                                                | 8-9   |
| Outcome data             | 15* | Report numbers of outcome events or summary measures over time                                                                                                                                                                                                                                                                                                                                                | 9     |
| Main results             | 16  | (a) Give unadjusted estimates and, if applicable, confounder-adjusted estimates and their precision (eg, 95% confidence interval). Make clear which confounders were adjusted for and why they were included<br>(b) Report category boundaries when continuous variables were categorized<br>(c) If relevant, consider translating estimates of relative risk into absolute risk for a meaningful time period | 9     |
| Other analyses           | 17  | Report other analyses done—eg analyses of subgroups and interactions, and sensitivity analyses                                                                                                                                                                                                                                                                                                                | n/a   |
| <b>Discussion</b>        |     |                                                                                                                                                                                                                                                                                                                                                                                                               |       |
| Key results              | 18  | Summarise key results with reference to study objectives                                                                                                                                                                                                                                                                                                                                                      | 10-11 |
| <b>Limitations</b>       |     |                                                                                                                                                                                                                                                                                                                                                                                                               |       |
| Interpretation           | 20  | Give a cautious overall interpretation of results considering objectives, limitations, multiplicity of analyses, results from similar studies, and other relevant evidence                                                                                                                                                                                                                                    | 11-12 |
| Generalisability         | 21  | Discuss the generalisability (external validity) of the study results                                                                                                                                                                                                                                                                                                                                         | 12    |
| <b>Other information</b> |     |                                                                                                                                                                                                                                                                                                                                                                                                               |       |
| Funding                  | 22  | Give the source of funding and the role of the funders for the present study and, if applicable, for the original study on which the present article is based                                                                                                                                                                                                                                                 | 13    |

\*Give information separately for cases and controls in case-control studies and, if applicable, for exposed and unexposed groups in cohort and cross-sectional studies.

**Note:** An Explanation and Elaboration article discusses each checklist item and gives methodological background and published examples of transparent reporting. The STROBE checklist is best used in conjunction with this article (freely available on the Web sites of PLoS Medicine at <http://www.plosmedicine.org/>, Annals of Internal Medicine at <http://www.annals.org/>, and Epidemiology at <http://www.epidem.com/>). Information on the STROBE Initiative is available at [www.strobe-statement.org](http://www.strobe-statement.org).
